# Supplementary material for: Design, synthesis and biological evaluation of arylsulfonamides as ADAMTS7 inhibitors
Source: Royal Society of Chemistry journal article supplement (doi:10.1039/d4md00149d), 2024-01-01
Supplement: d4md00149d1.pdf [file d4md00149d1.pdf]

## SUPPORTING INFORMATION FOR

### Design, synthesis and biological evaluation of arylsulfonamides as ADAMTS7 inhibitors

*Doretta Cuffaro,<sup>1,¶</sup> Tina Burkhard,<sup>2,¶</sup> Bianca Laura Bernardoni,<sup>1</sup> Riccardo Di Leo,<sup>1</sup> Xiaohan Zhang,<sup>3</sup>  
Salvatore Galati,<sup>1</sup> Tiziano Tuccinardi,<sup>1</sup> Marco Macchia,<sup>1</sup> Armando Rossello,<sup>1</sup> Salvatore Santamaria,<sup>2,#,\*</sup>  
Rens de Groot,<sup>3,#,\*</sup> and Elisa Nuti<sup>1,#,\*</sup>*

<sup>1</sup> Department of Pharmacy, University of Pisa, Via Bonanno 6, 56126 Pisa, Italy

<sup>2</sup> Department of Biochemical and Physiological Sciences, School of Biosciences, Faculty of Health and Medical Sciences, Edward Jenner Building, University of Surrey, Guildford GU2 7XH, UK

<sup>3</sup> Institute of Cardiovascular Science, University College London, 51 Chenies Mews, London WC1E 6HX, UK.

\*Correspondence: Salvatore Santamaria, e-mail: [s.santamaria@surrey.ac.uk](mailto:s.santamaria@surrey.ac.uk); Rens de Groot, e-mail: [R.deGroot@ucl.ac.uk](mailto:R.deGroot@ucl.ac.uk); Elisa Nuti: e-mail: [elisa.nuti@unipi.it](mailto:elisa.nuti@unipi.it)

¶ D.C. and T.B. contributed equally to this work.

# E.N. and RdG and S.S. contributed equally to this work.

#### Table of Contents

|                                                                                  |            |
|----------------------------------------------------------------------------------|------------|
| <b>I. Representative NMR spectra of final compounds (1, 2, 3, 3a-g, and 4)</b>   | <b>S2</b>  |
| <b>II. Representative HRMS spectra of final compounds (1, 2, 3, 3a-g, and 4)</b> | <b>S13</b> |
| <b>III. Representative NMR spectra of intermediate compounds</b>                 | <b>S20</b> |
| <b>IV. Figure S1</b>                                                             | <b>S43</b> |
| <b>V. Figure S2</b>                                                              | <b>S43</b> |



Compound 2:  $^1\text{H}$  NMR (400 MHz,  $\text{CD}_3\text{OD}$ )

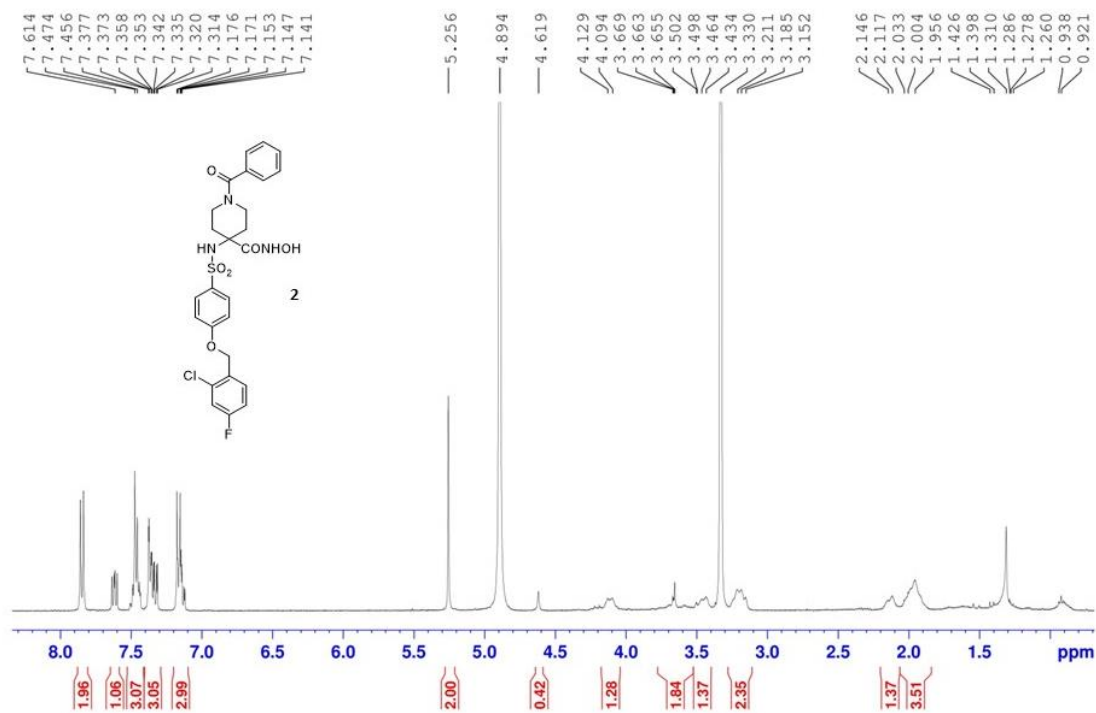

Compound 2:  $^{13}\text{C}$  NMR (100 MHz,  $\text{CD}_3\text{OD}$ )

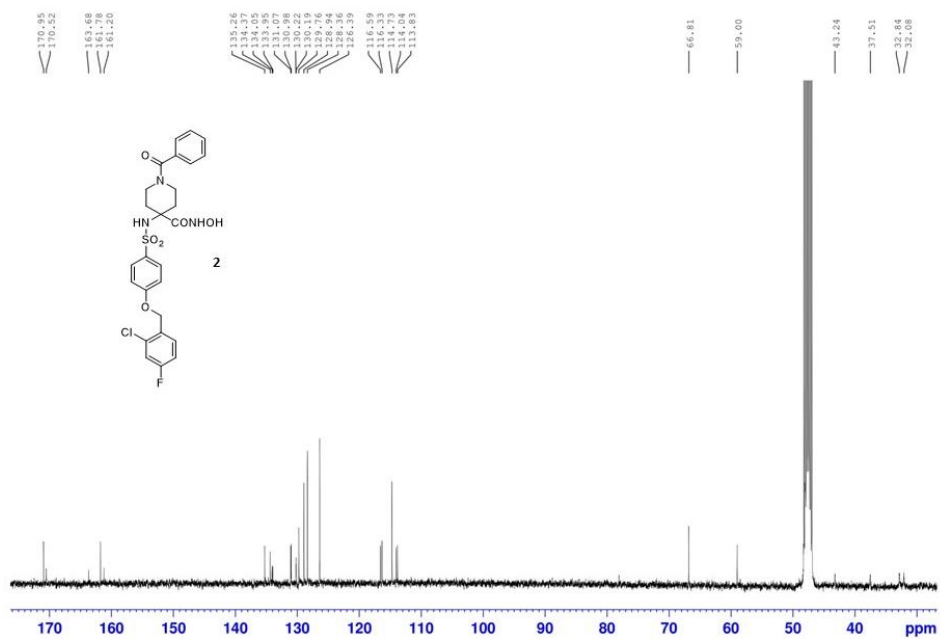

Compound 3:  $^1\text{H}$  NMR (400 MHz,  $\text{CD}_3\text{OD}$ ).

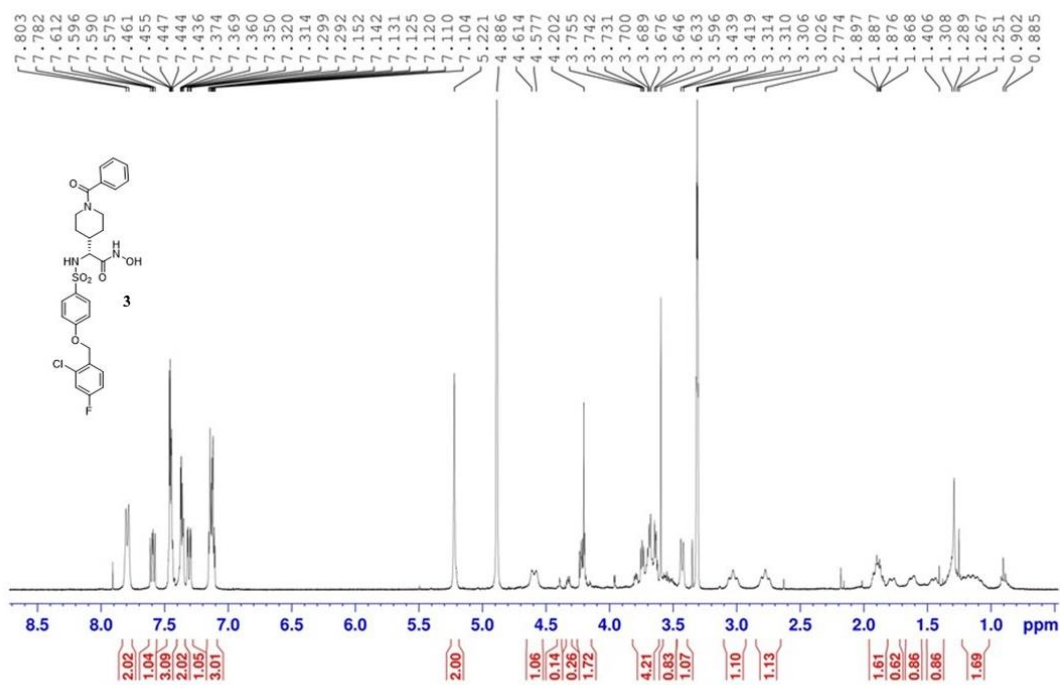

Compound 3:  $^{13}\text{C}$  NMR (100 MHz,  $\text{CD}_3\text{OD}$ ).

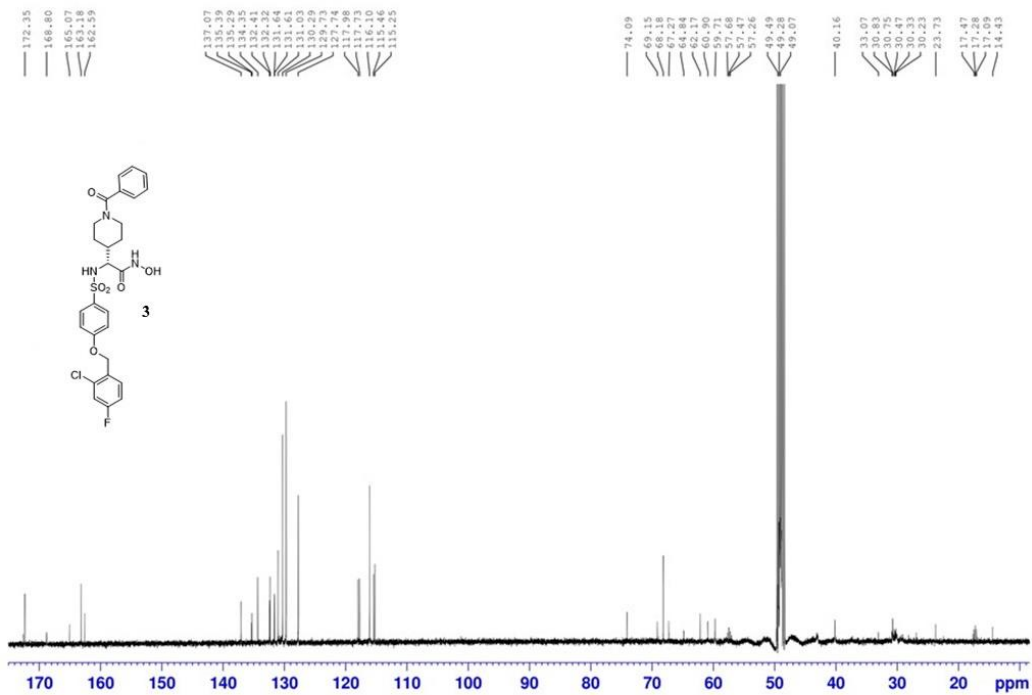

Compound **3a**:  $^1\text{H}$  NMR (400 MHz,  $\text{DMSO-}d_6$ ).

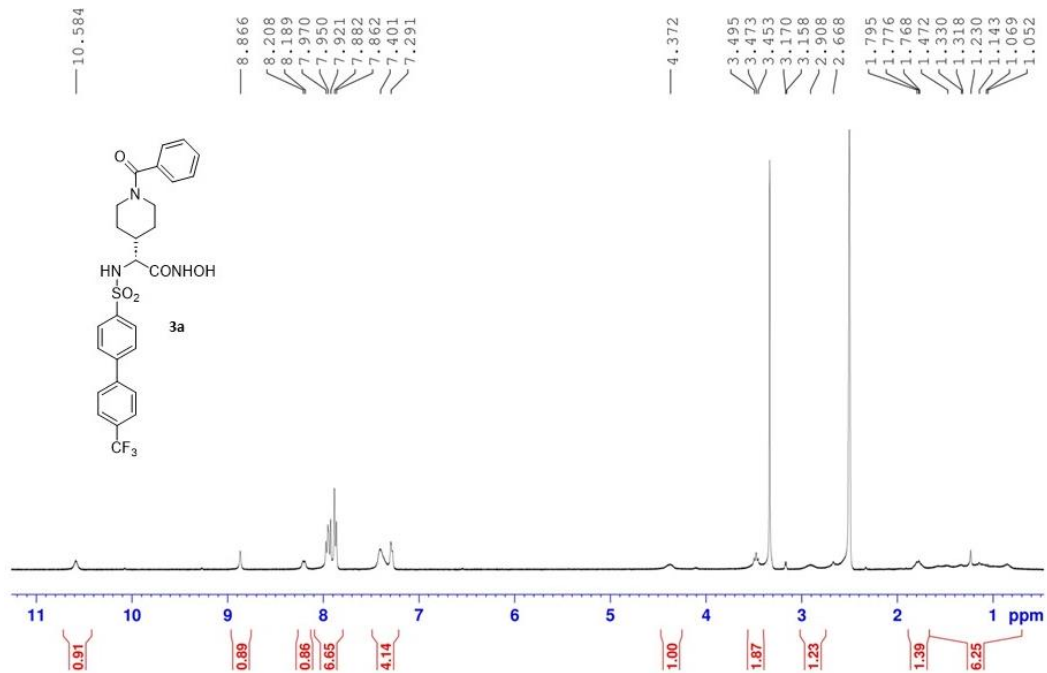

Compound **3a**:  $^{13}\text{C}$  NMR (100 MHz,  $\text{DMSO-}d_6$ ).

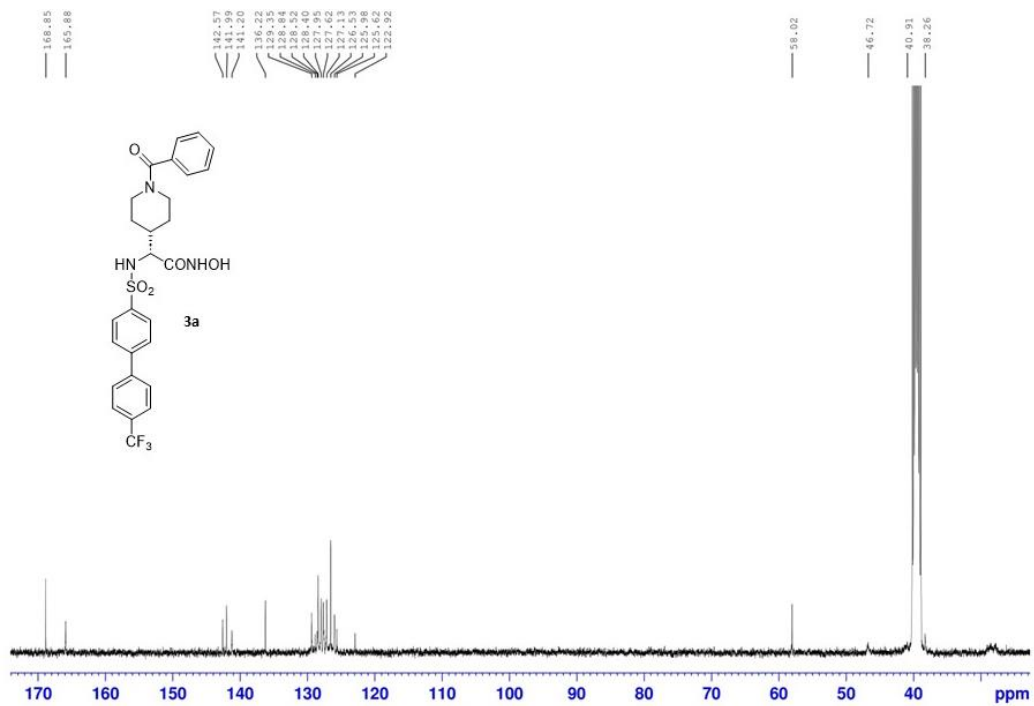

Compound **3b**:  $^1\text{H}$  NMR (400 MHz,  $\text{CDCl}_3$ ).

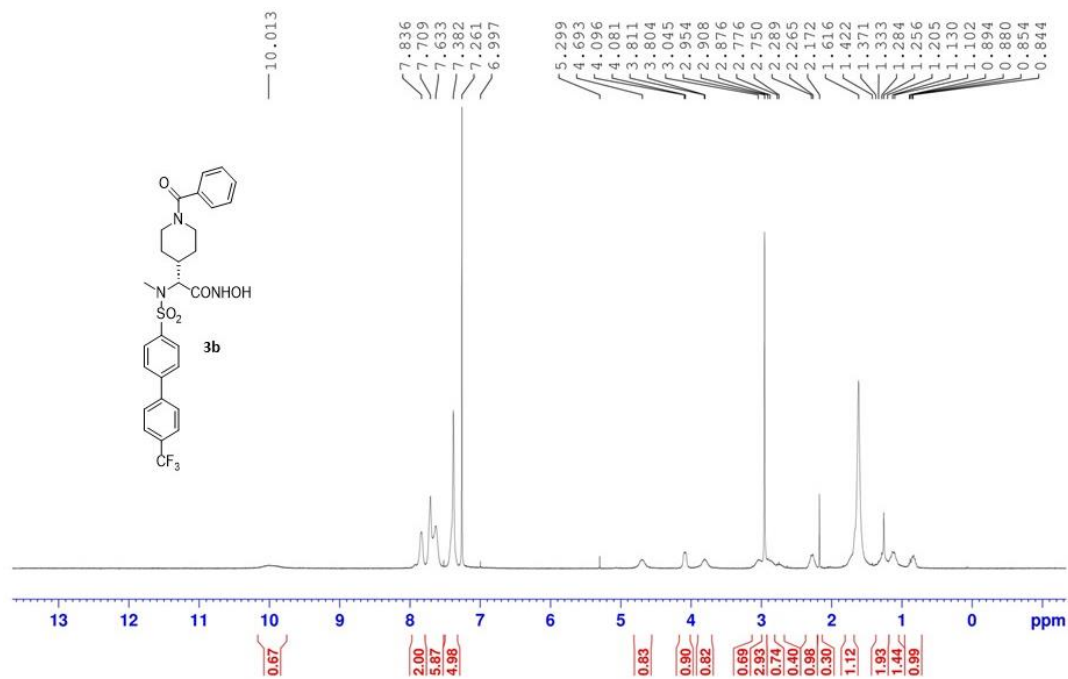

Compound **3b**:  $^{13}\text{C}$  NMR (100 MHz,  $\text{CDCl}_3$ ).

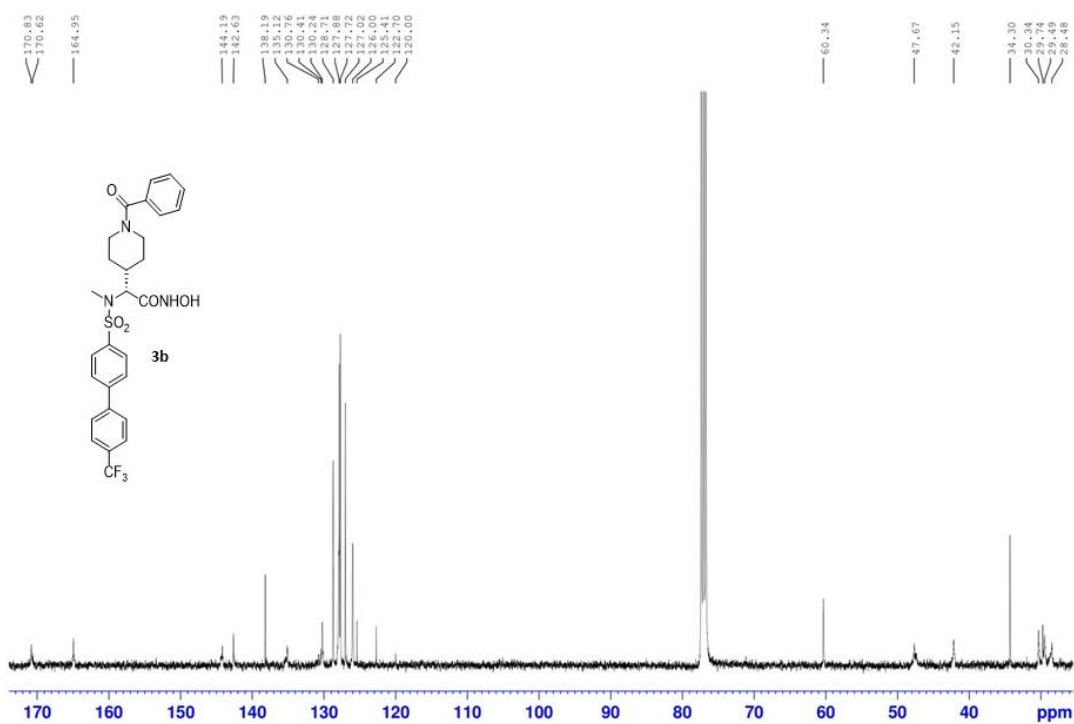

Compound **3c**:  $^1\text{H}$  NMR (400 MHz,  $\text{CD}_3\text{OD}$ ).

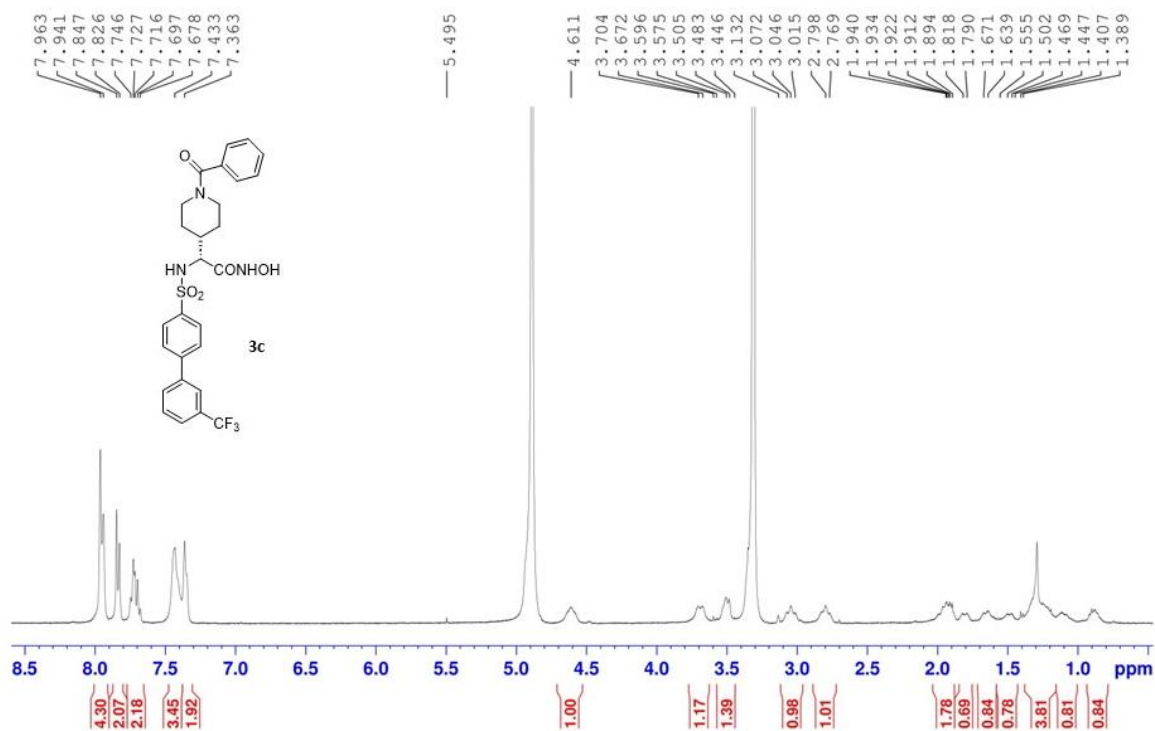

Compound **3c**:  $^{13}\text{C}$  NMR (100 MHz,  $\text{CD}_3\text{OD}$ ).

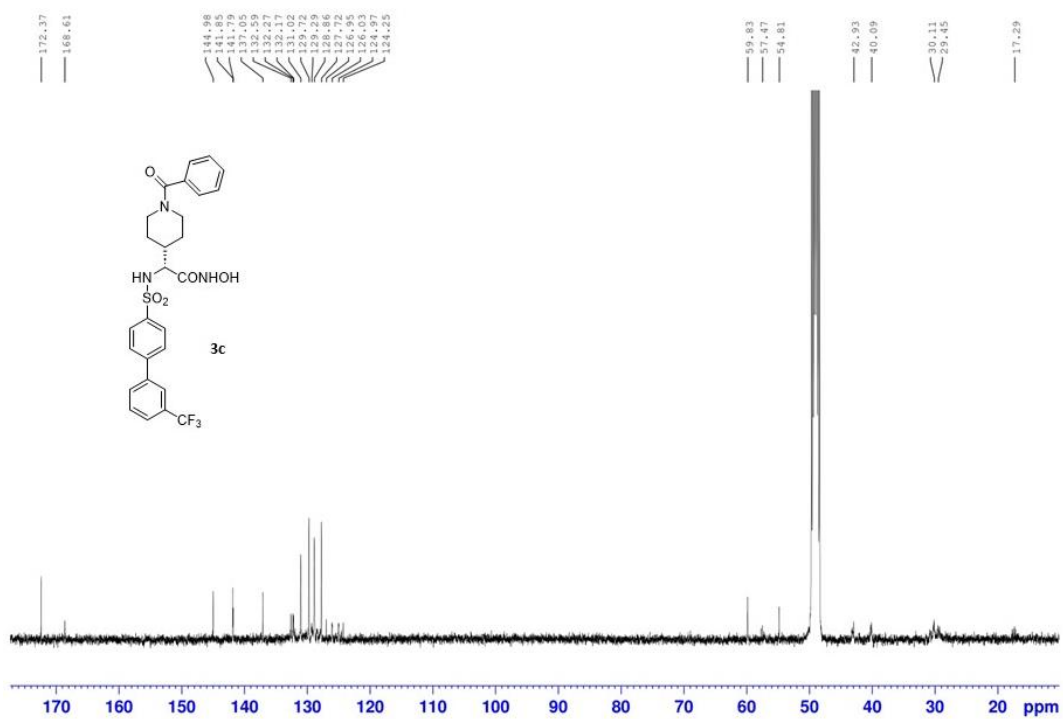

Compound **3d**:  $^1\text{H}$  NMR (400 MHz,  $\text{DMSO-}d_6$ ).

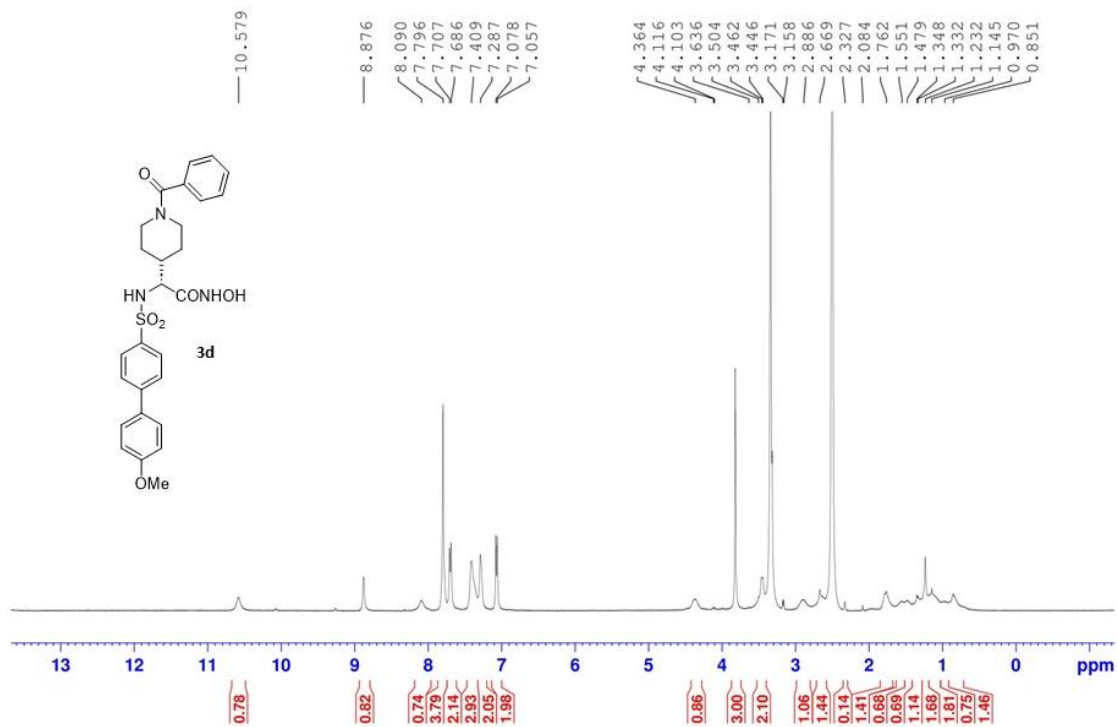

Compound **3d**:  $^{13}\text{C}$  NMR (100 MHz,  $\text{DMSO-}d_6$ ).

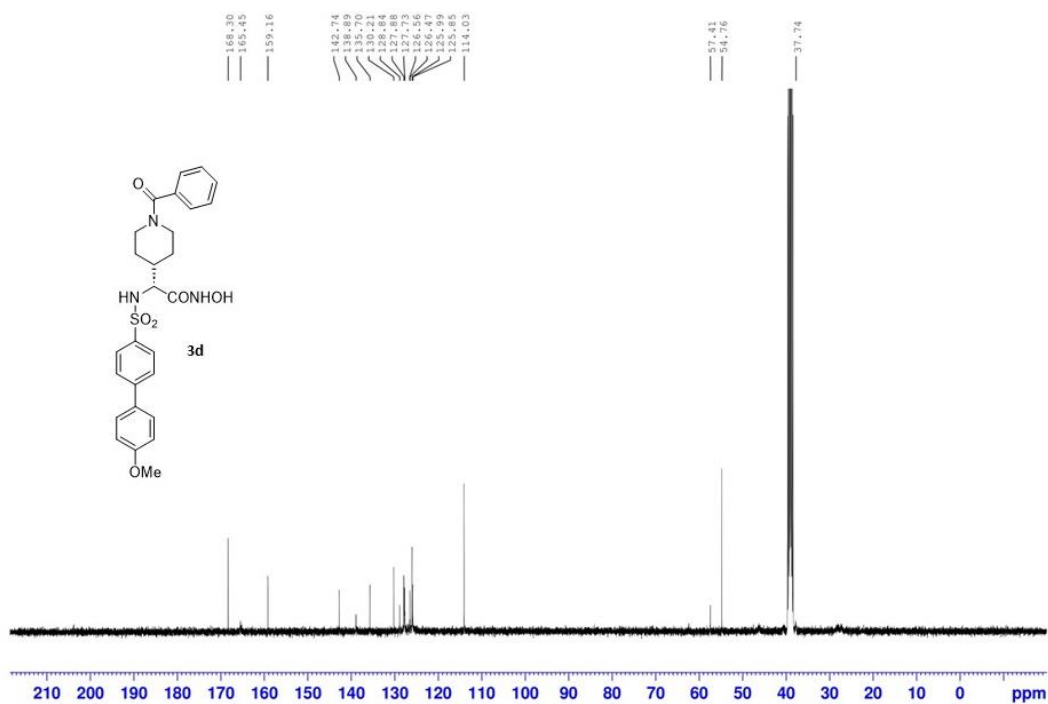



Compound **3e**:  $^1\text{H}$  NMR (400 MHz,  $\text{DMSO-}d_6$ ).

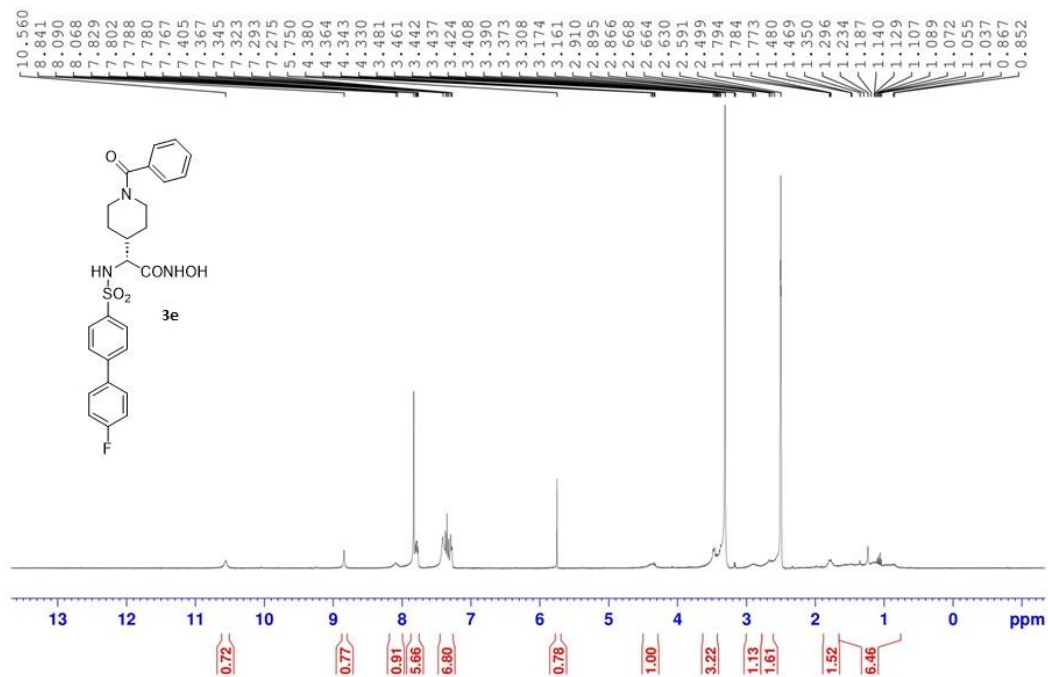

Compound **3e**:  $^{13}\text{C}$  NMR (100 MHz,  $\text{CD}_3\text{OD}$ ).

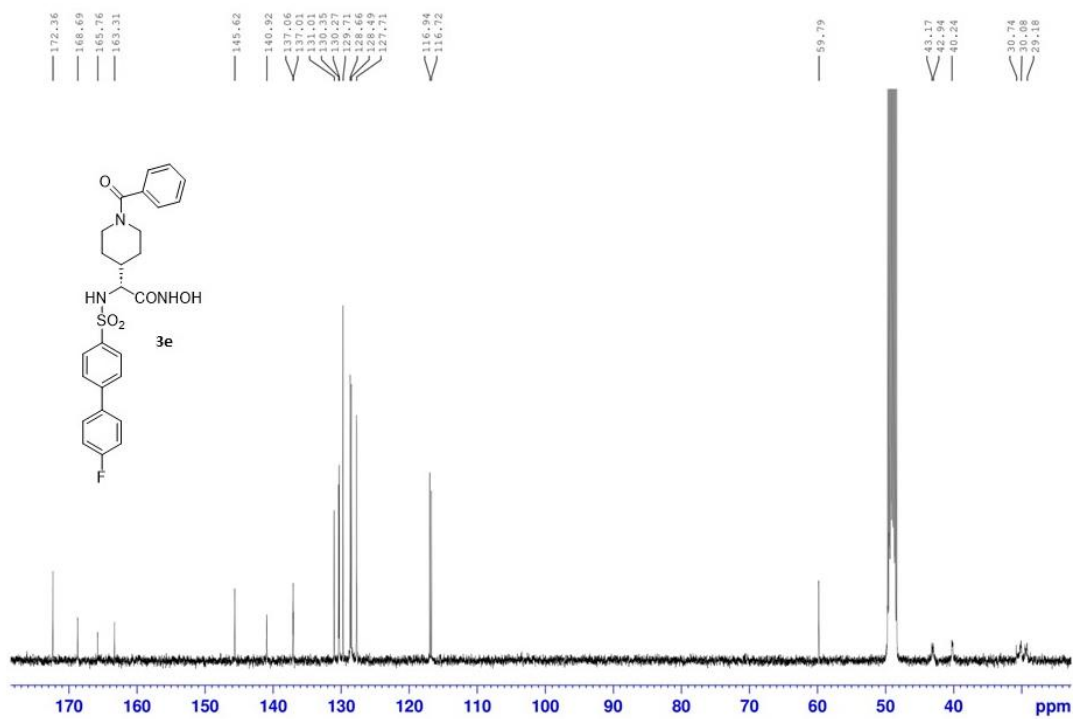

Compound **3f**:  $^1\text{H}$  NMR (400 MHz,  $\text{DMSO-}d_6$ ).

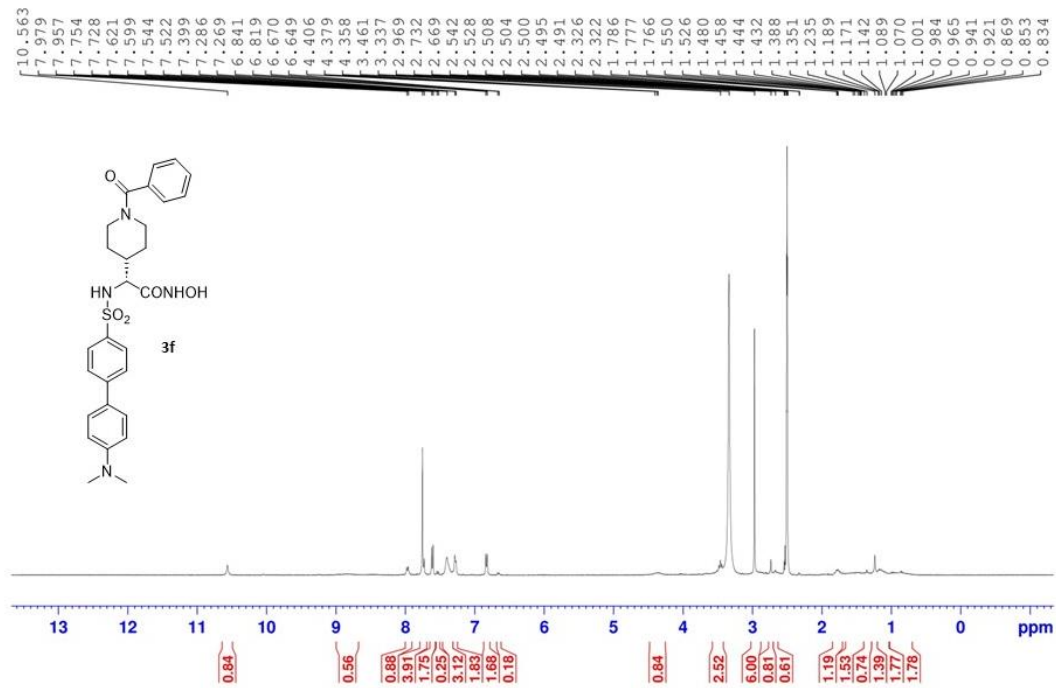

Compound **3f**:  $^{13}\text{C}$  NMR (100 MHz,  $\text{DMSO-}d_6$ ).

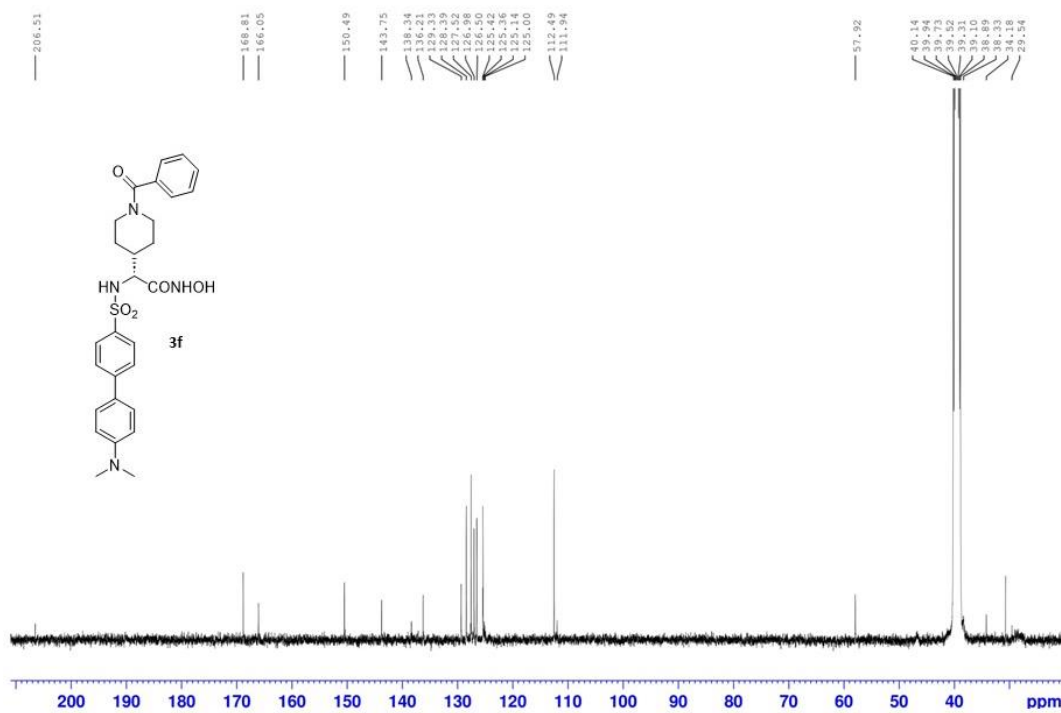

Compound **3g**:  $^1\text{H}$  NMR (400 MHz,  $\text{DMSO-}d_6$ ).

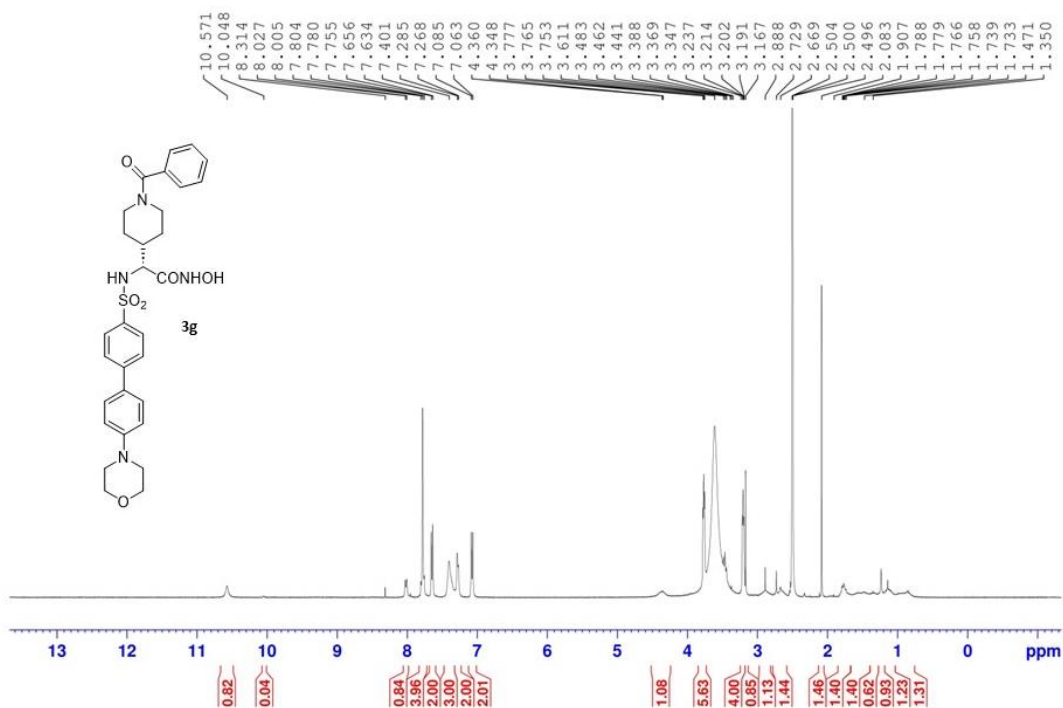

Compound **3g**:  $^{13}\text{C}$  NMR (100 MHz,  $\text{DMSO-}d_6$ ).

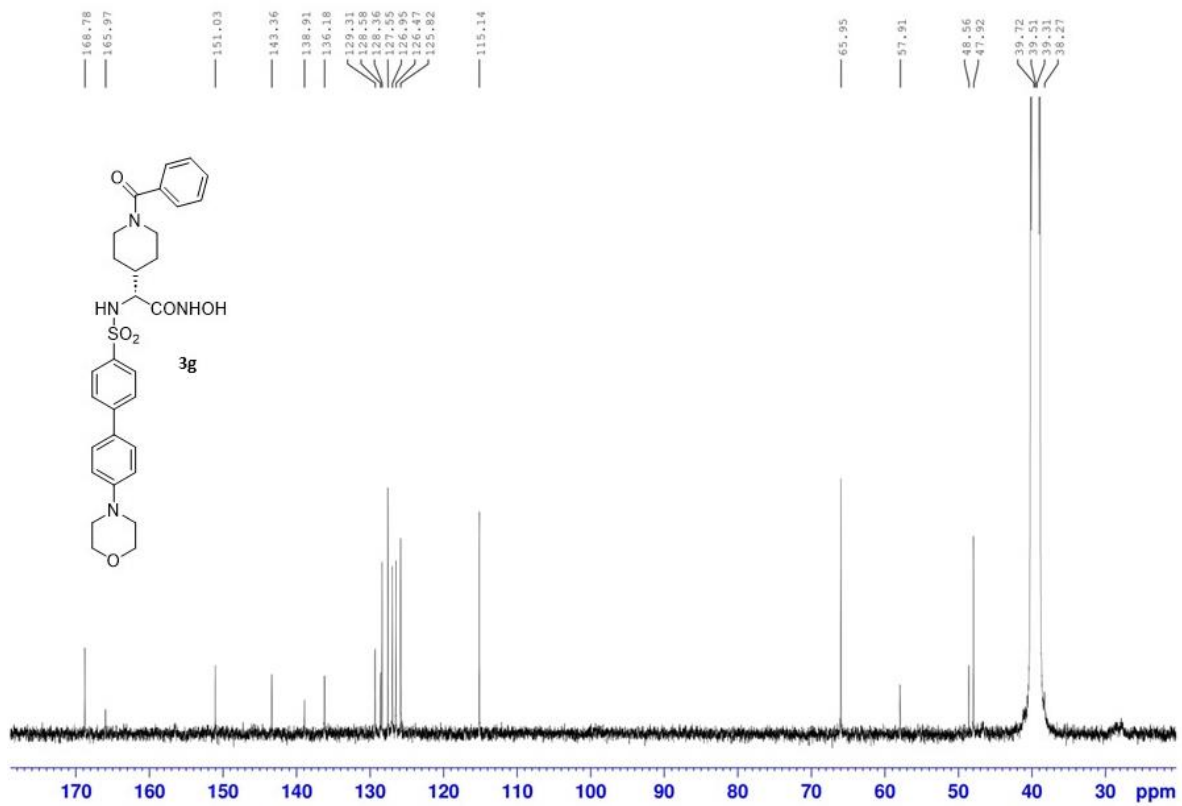

Compound 4:  $^1\text{H}$  NMR (400 MHz,  $\text{CD}_3\text{OD}$ ).

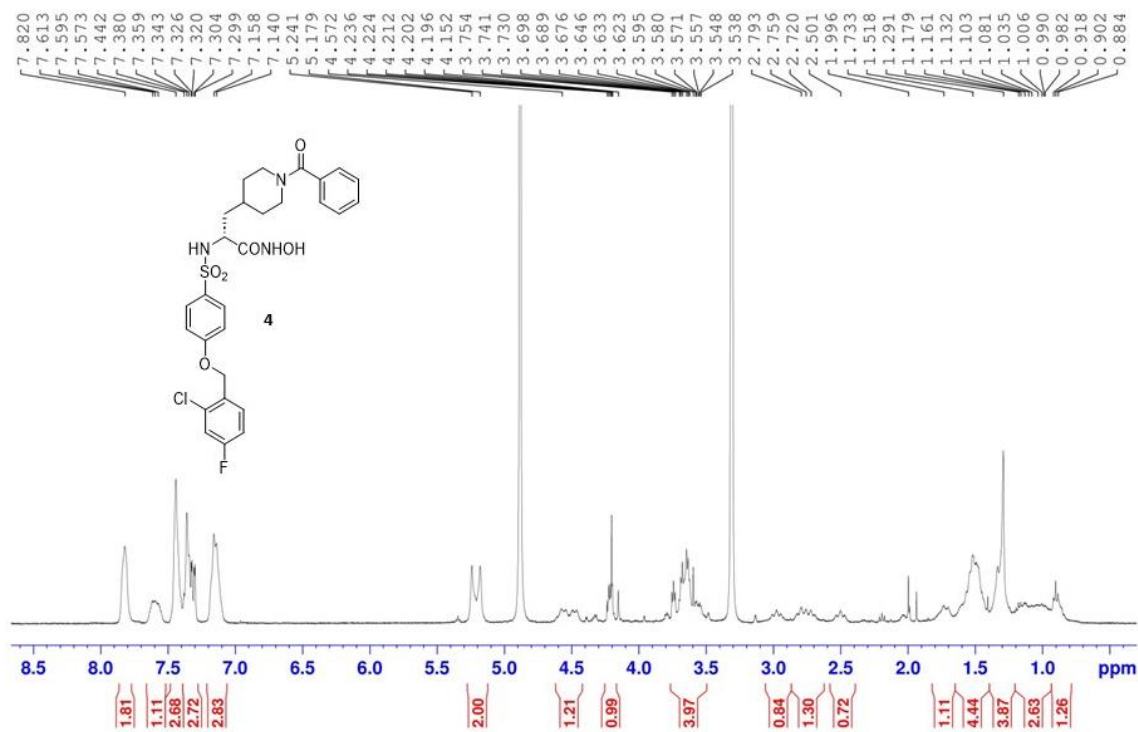

Compound 4:  $^{13}\text{C}$  NMR (100 MHz,  $\text{CD}_3\text{OD}$ ).

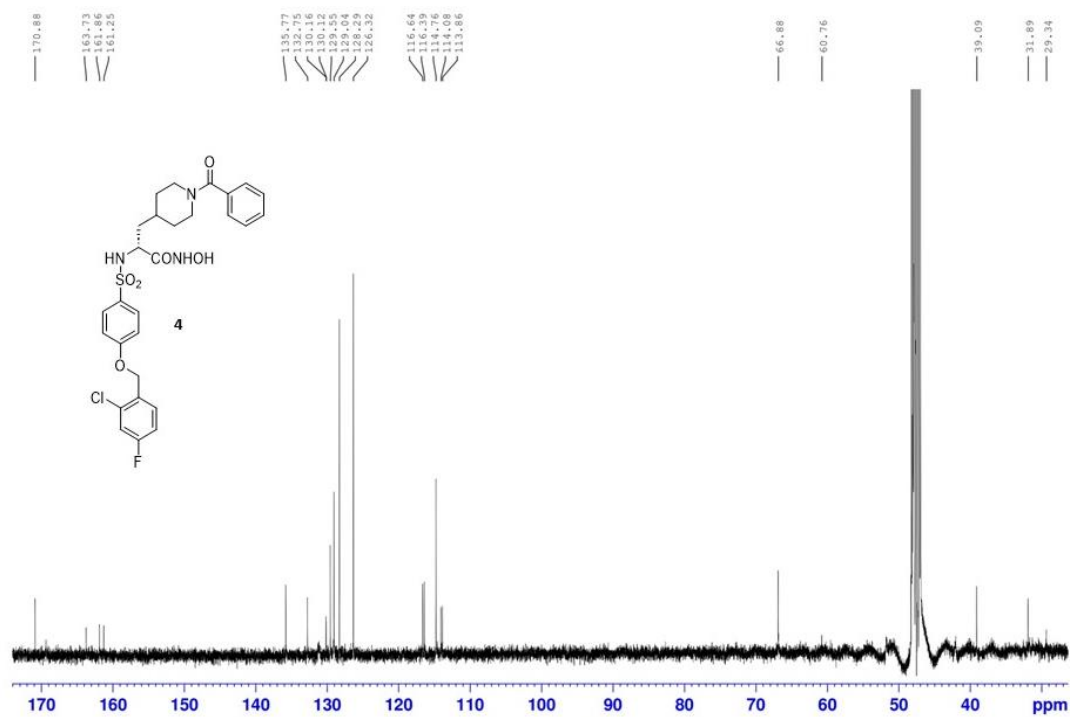

## II. Representative HRMS spectra of final compounds (1, 2, 3, 3a-g, and 4)

### HRMS spectrum of compound 1

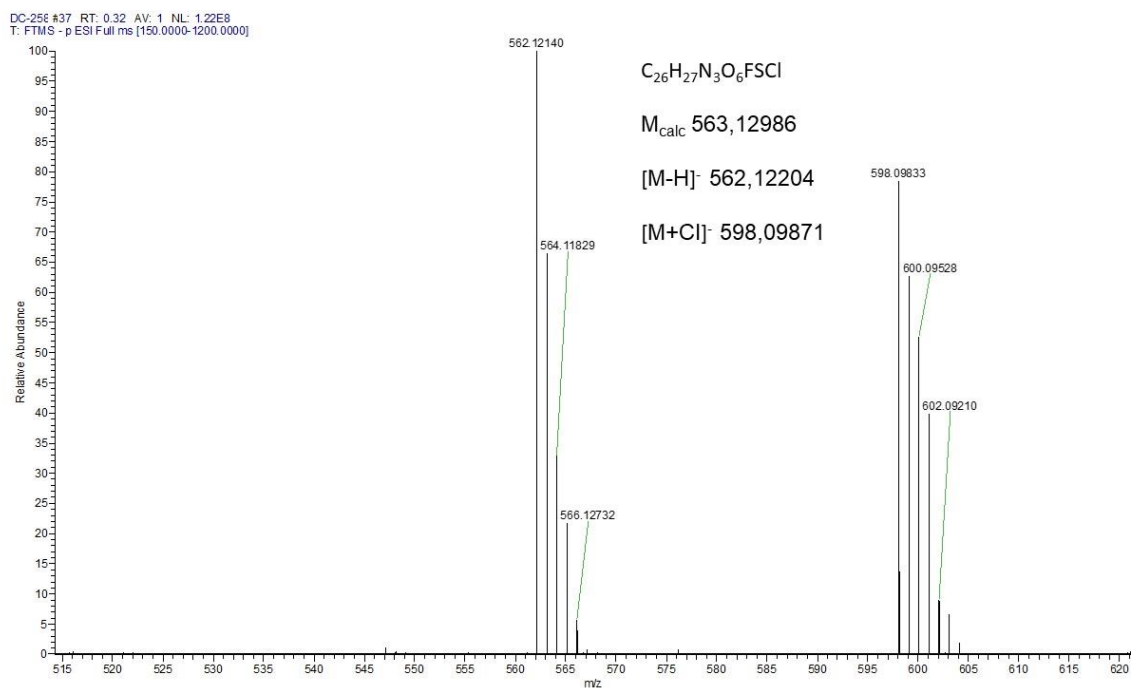

### HRMS spectrum of compound 2

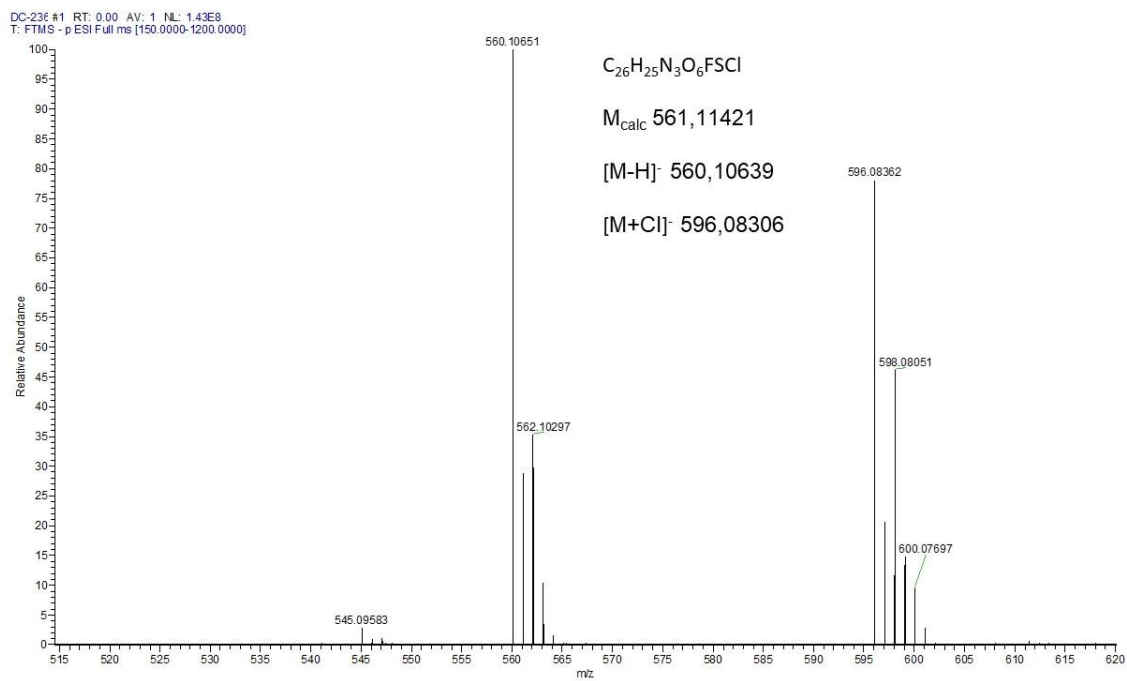

### HRMS spectrum of compound **3**

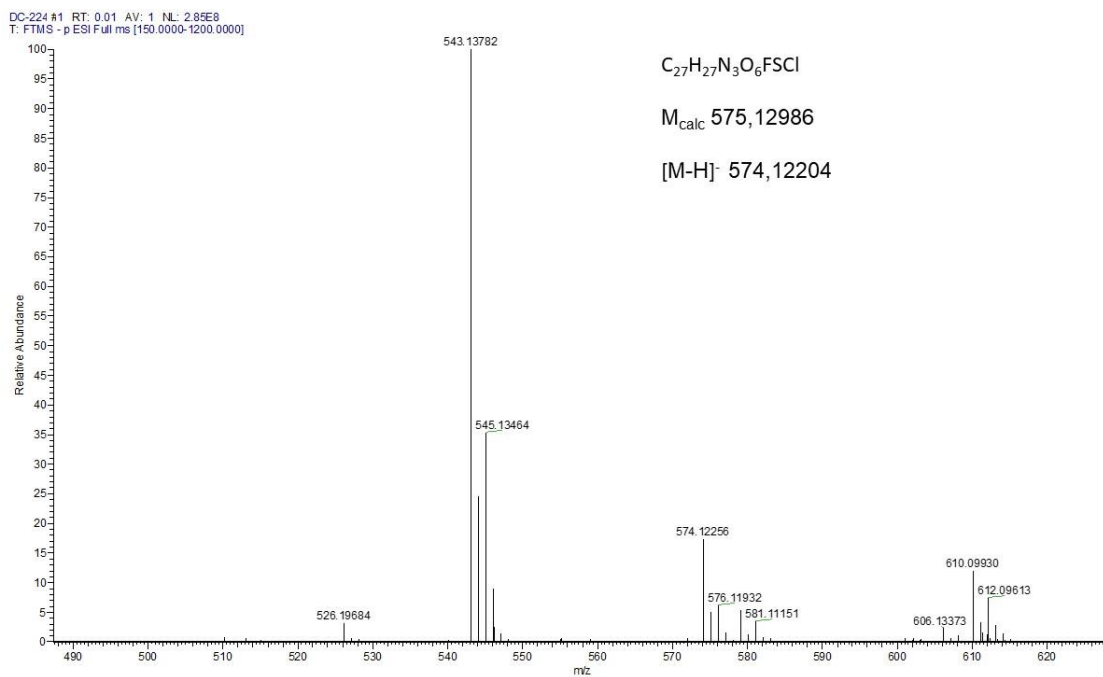

### HRMS spectrum of compound **3a**

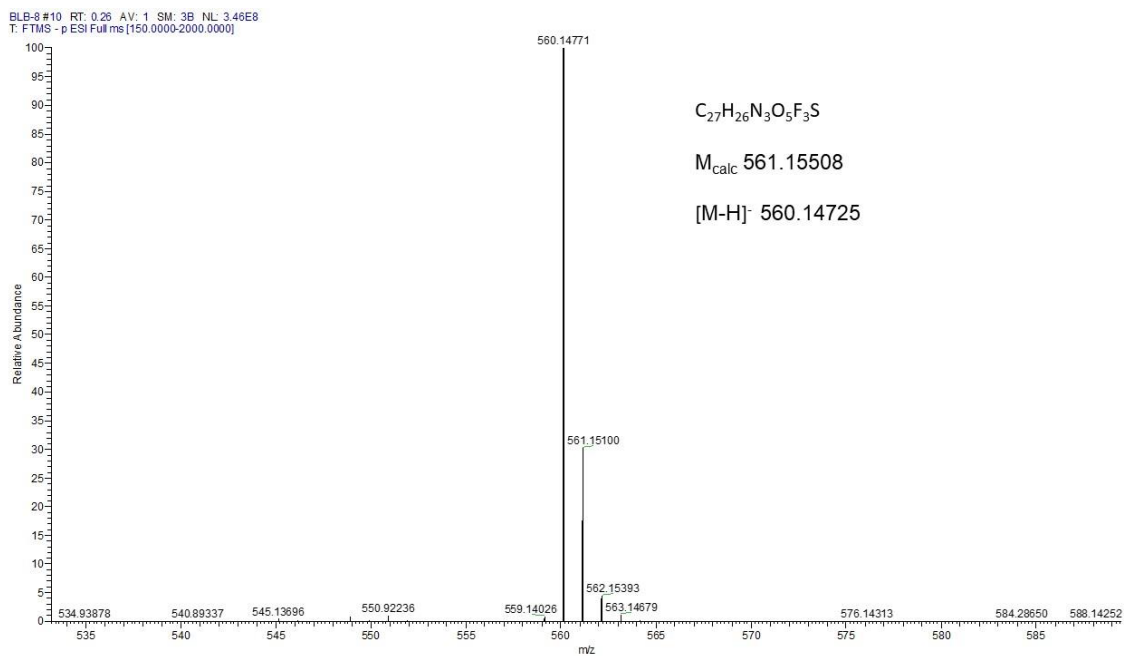

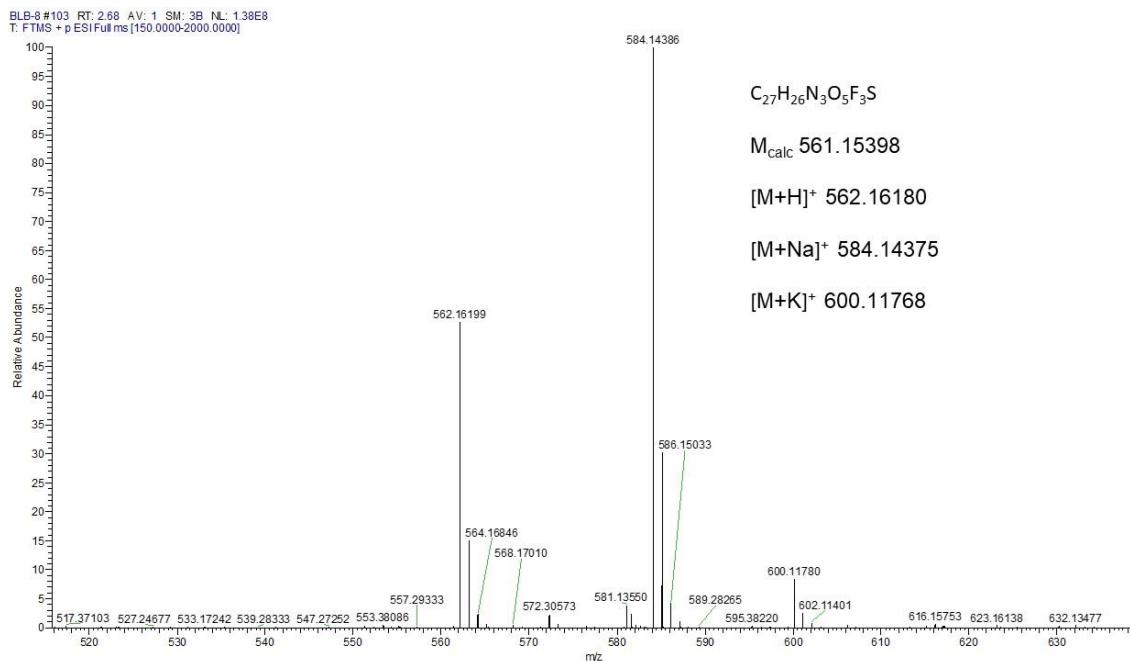

### HRMS spectrum of compound **3b**

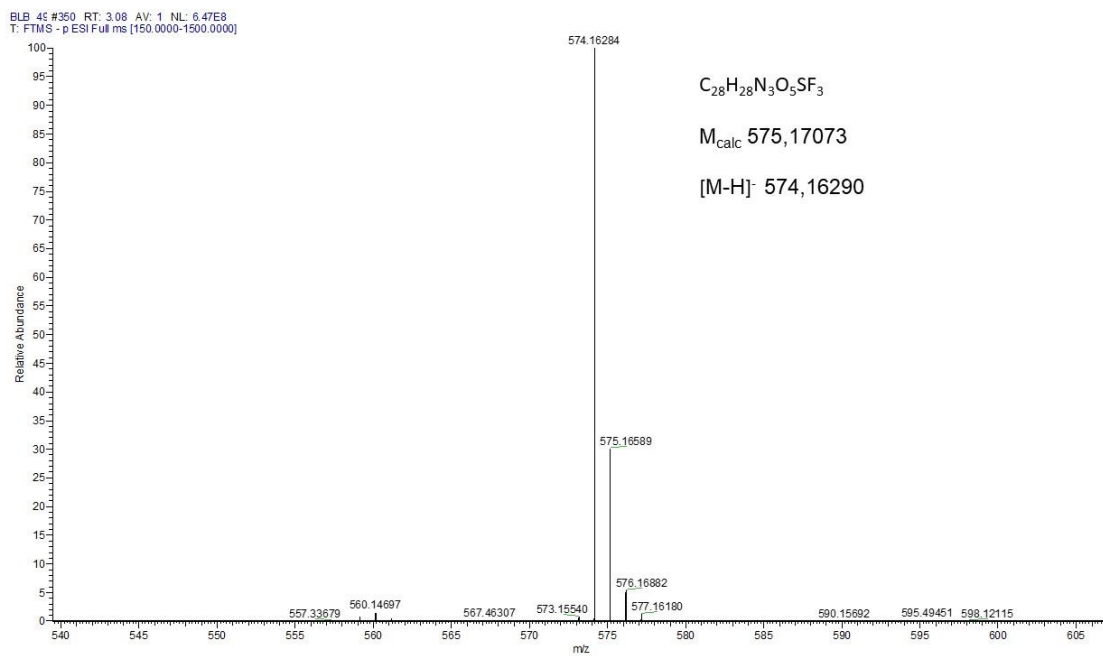

## HRMS spectrum of compound **3c**

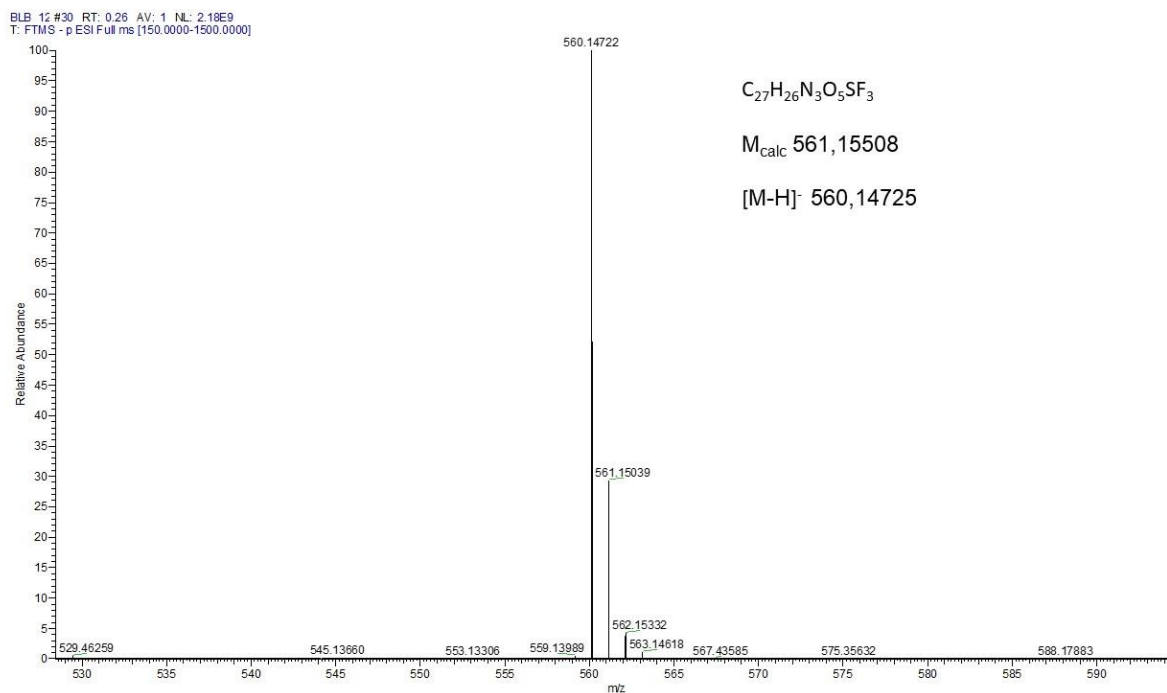

## HRMS spectrum of compound **3d**

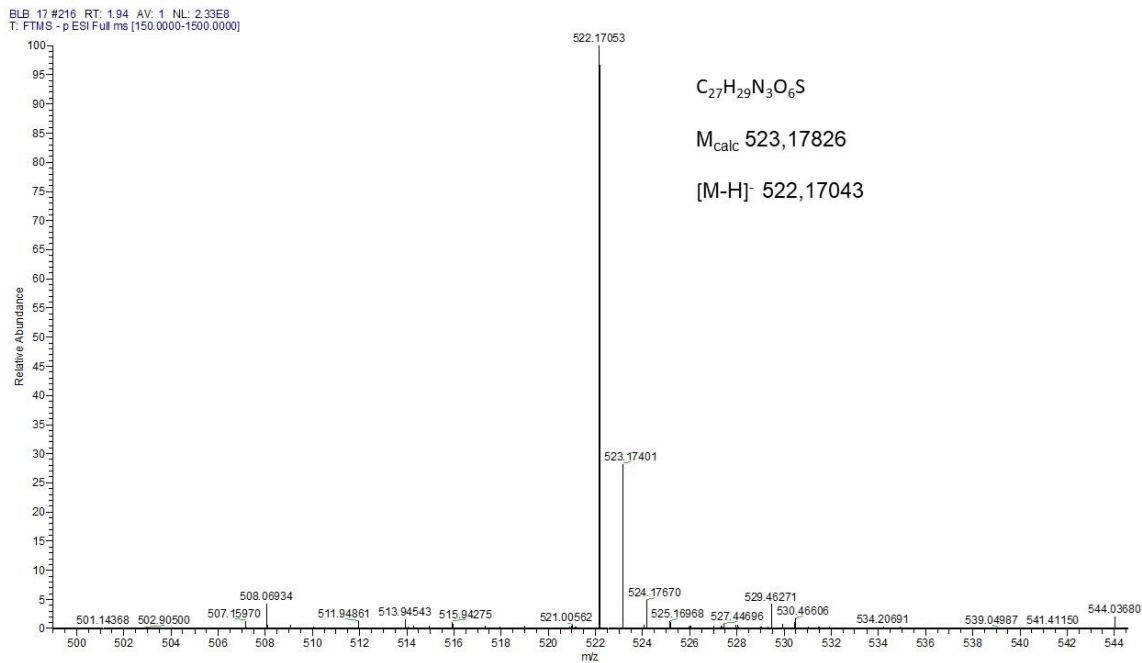



## HRMS spectrum of compound 3e

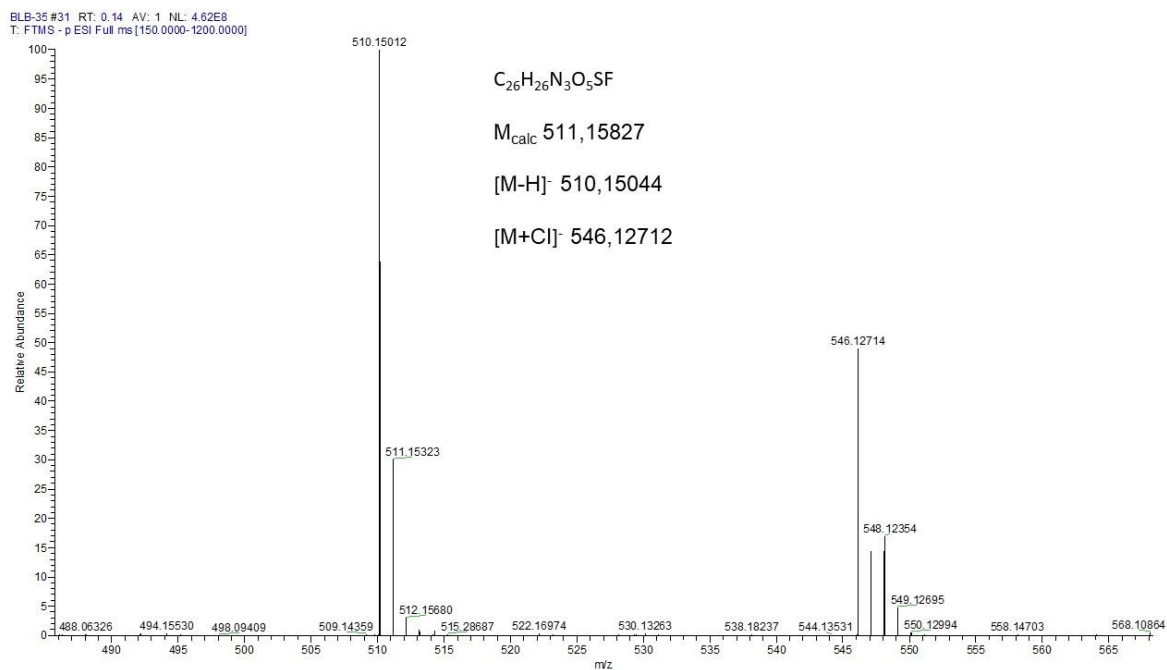

## HRMS spectrum of compound 3f

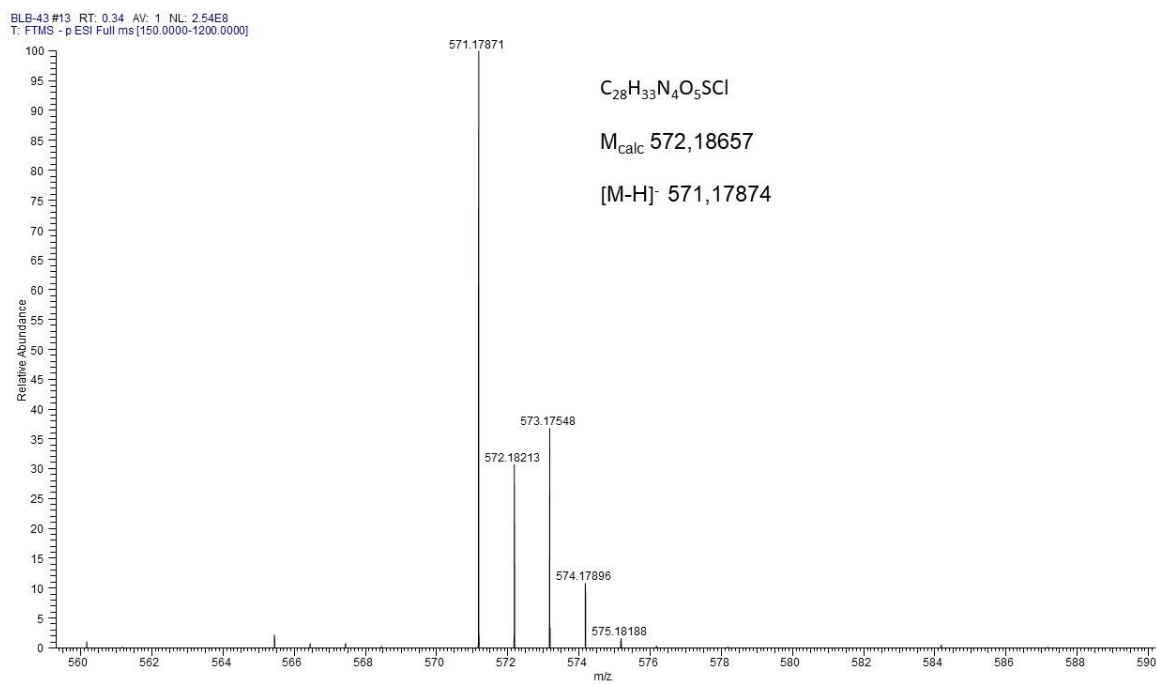

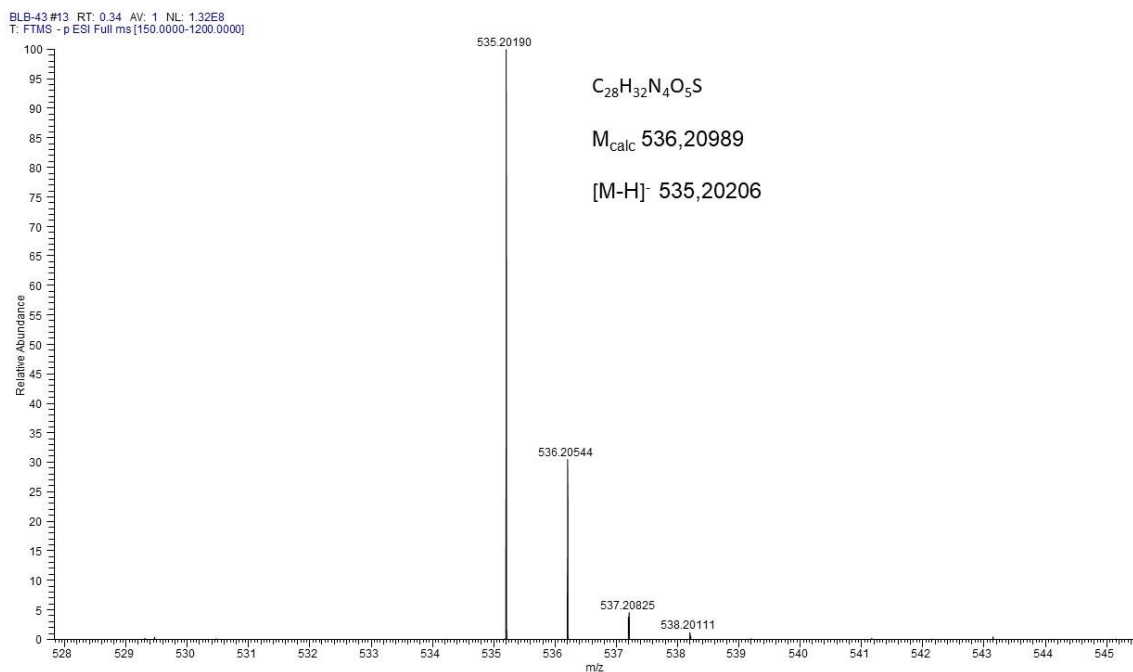

### HRMS spectrum of compound **3g**

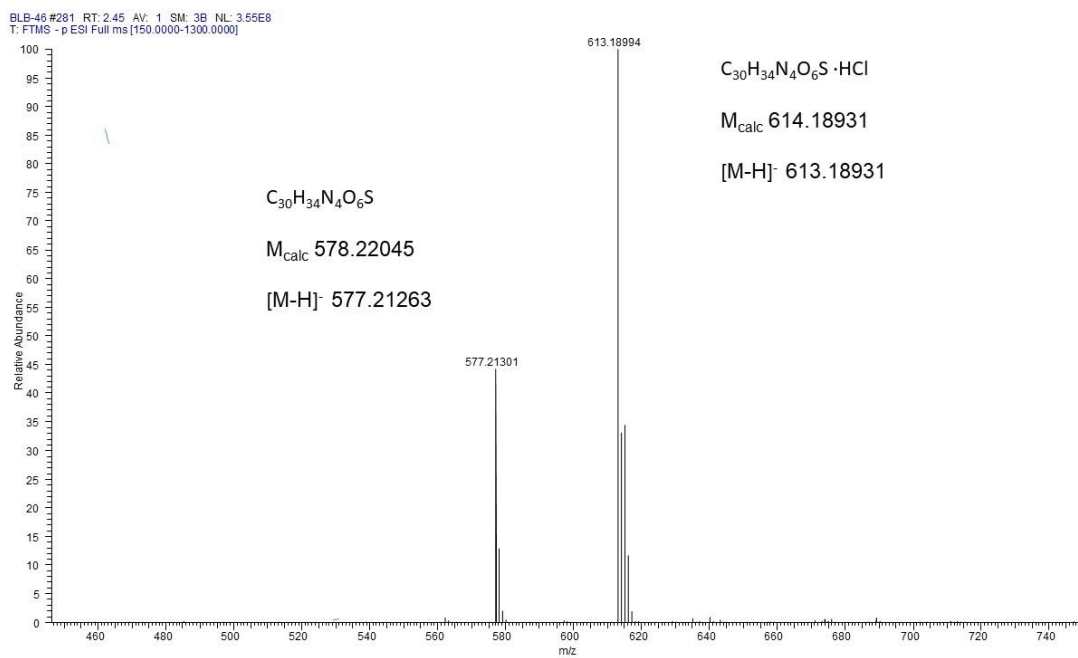

# HRMS spectrum of compound 4

DC-263 #1 RT: 0.01 AV: 1 NL: 5.92E8  
T: FTMS - p ESI Full ms [150.0000-1200.0000]

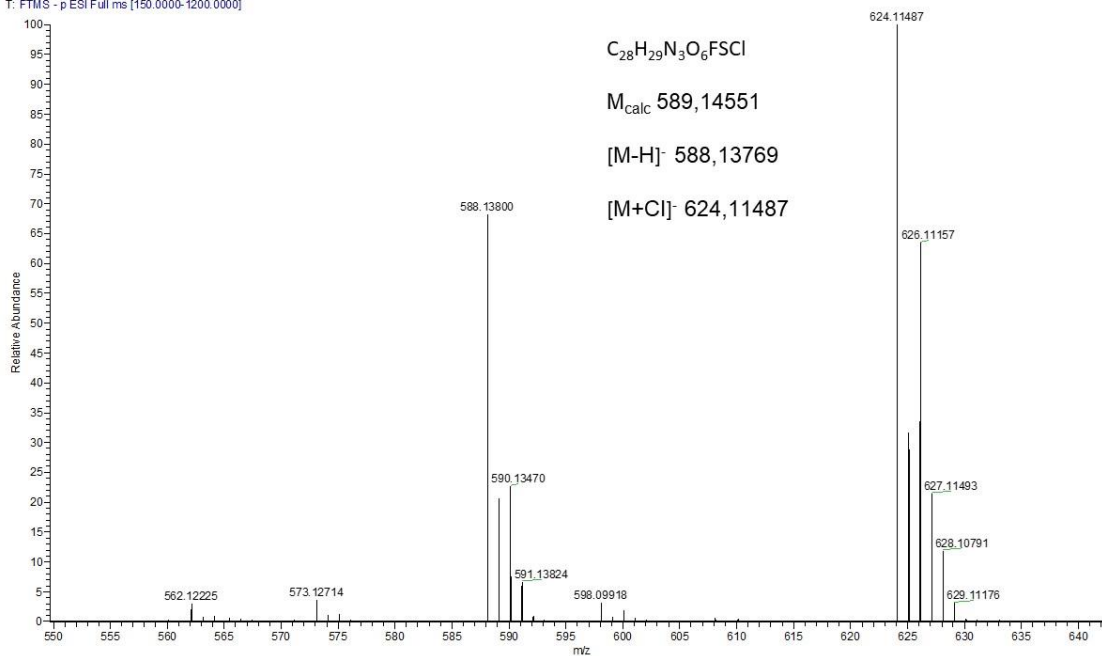

### III. Representative NMR spectra of intermediate compounds

#### Scheme 1: Synthesis of final compound 1

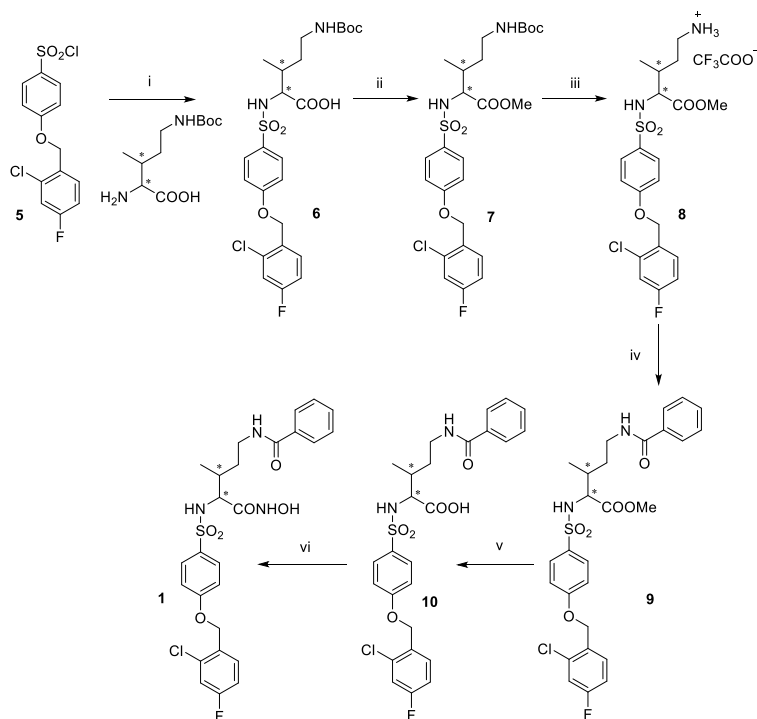

Compound 6: <sup>1</sup>H NMR (400 MHz, DMSO).

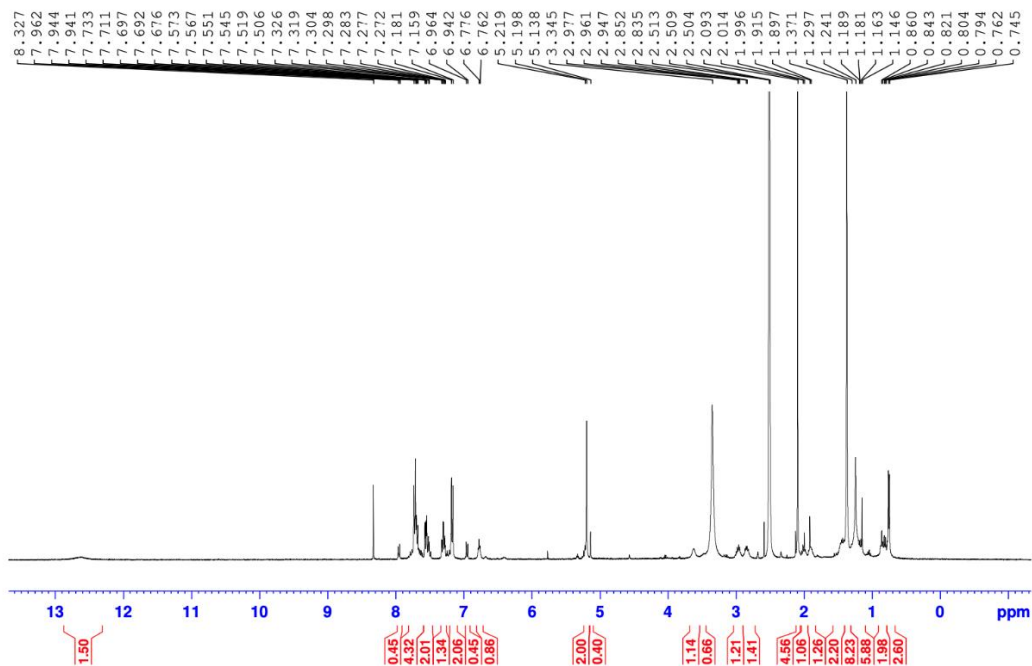

Compound 6:  $^1\text{H}$ - $^1\text{H}$  COSY NMR (400 MHz, DMSO).

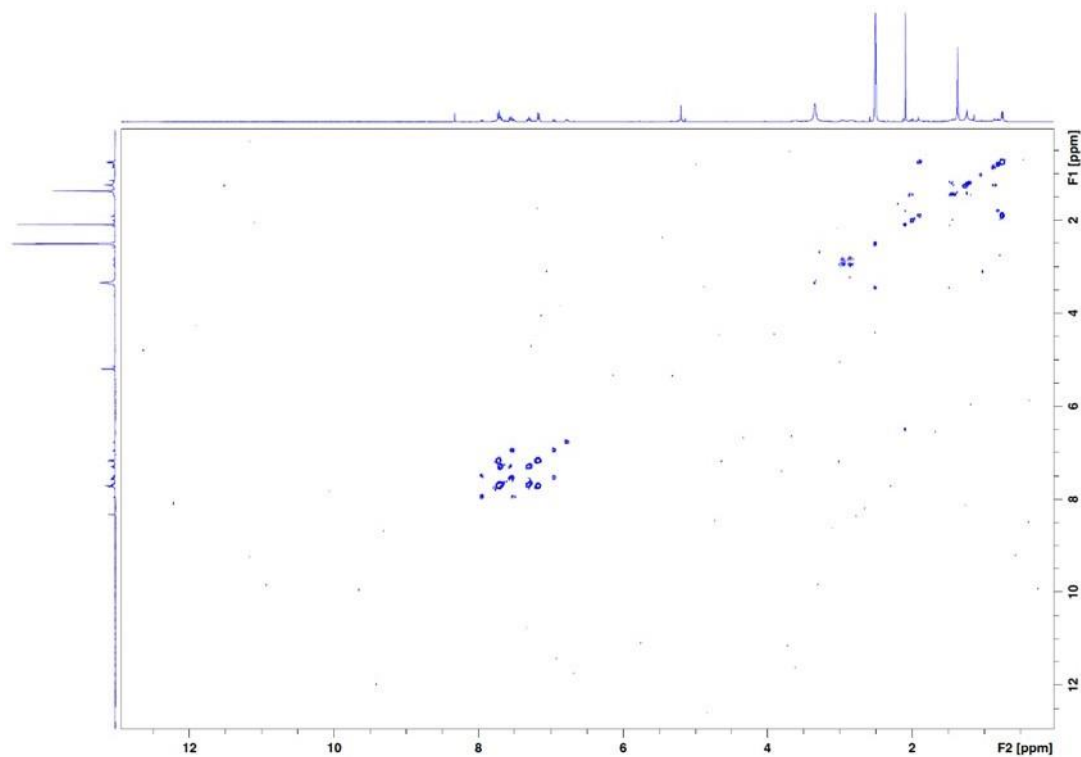

Compound 7:  $^1\text{H}$  NMR (400 MHz,  $\text{CDCl}_3$ ).

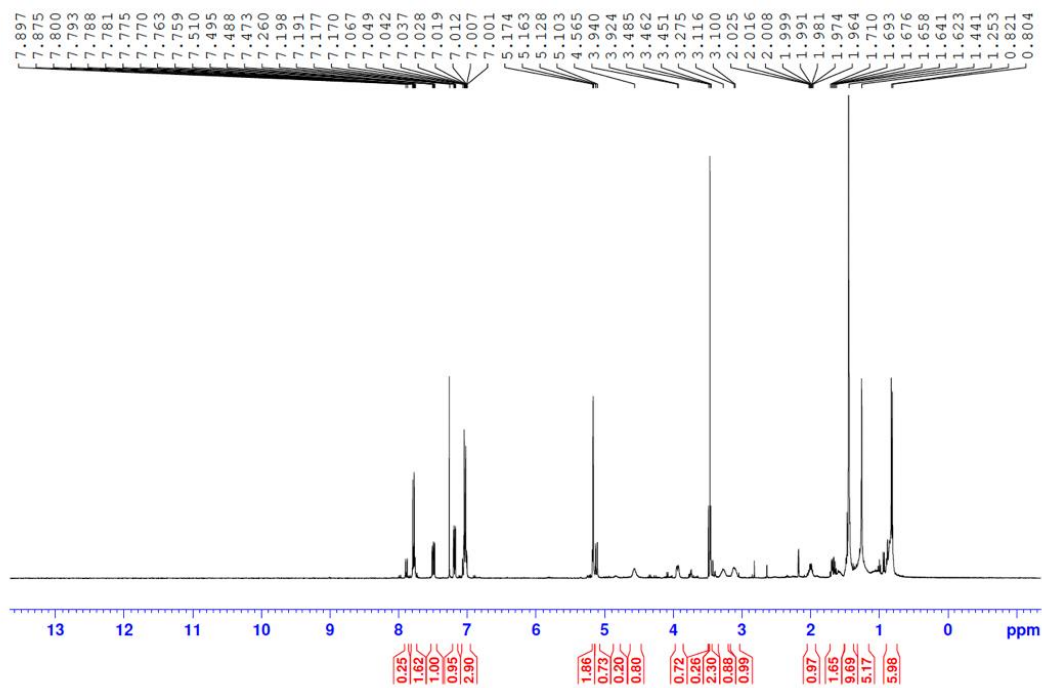

Compound **8**:  $^1\text{H}$  NMR (400 MHz, DMSO).

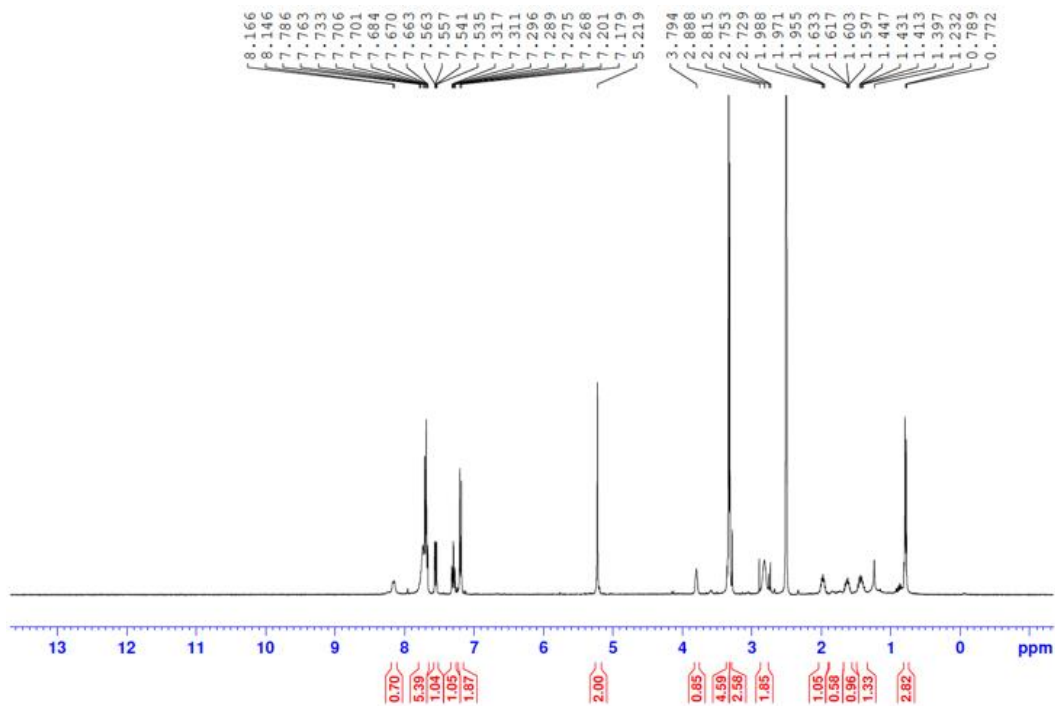

Compound **9**:  $^1\text{H}$  NMR (400 MHz,  $\text{CDCl}_3$ ).

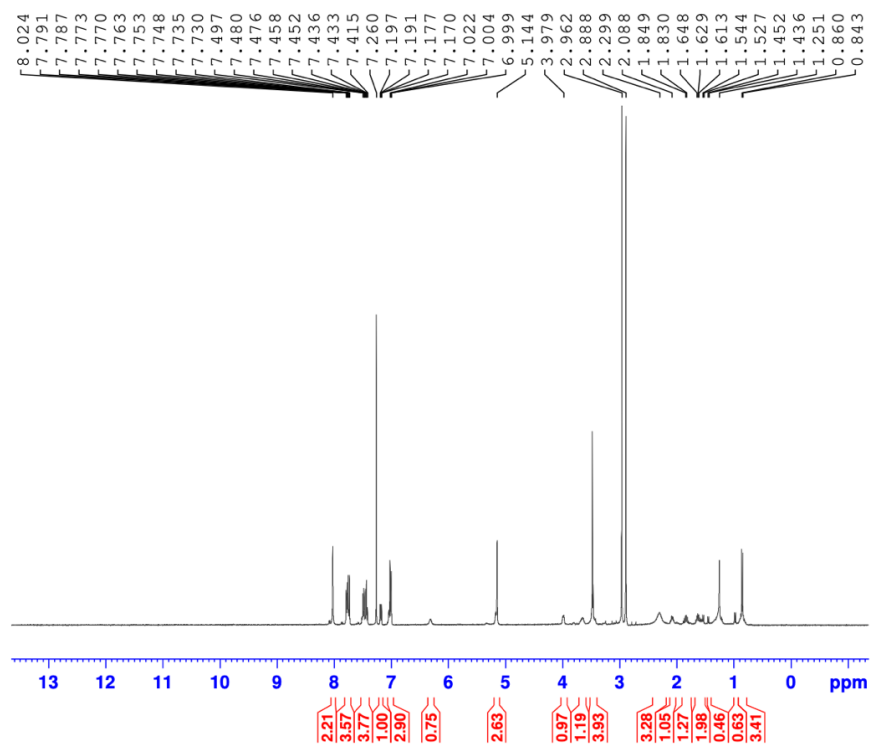

Compound **10**:  $^1\text{H}$  NMR (400 MHz, DMSO).

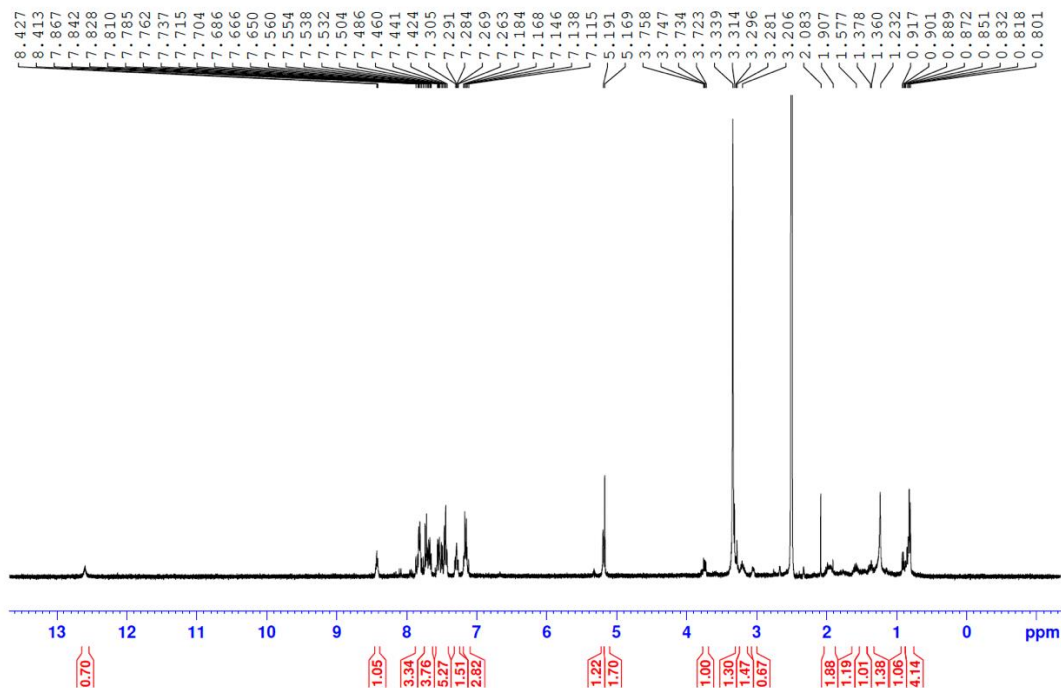

Scheme 2: Synthesis of final compounds **2,4**

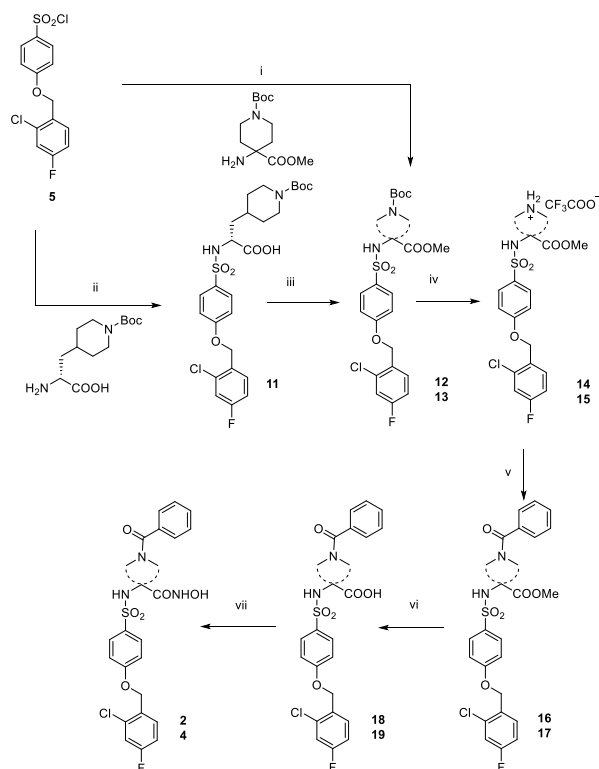

Compound 11:  $^1\text{H}$  NMR (400 MHz,  $\text{CDCl}_3$ ).

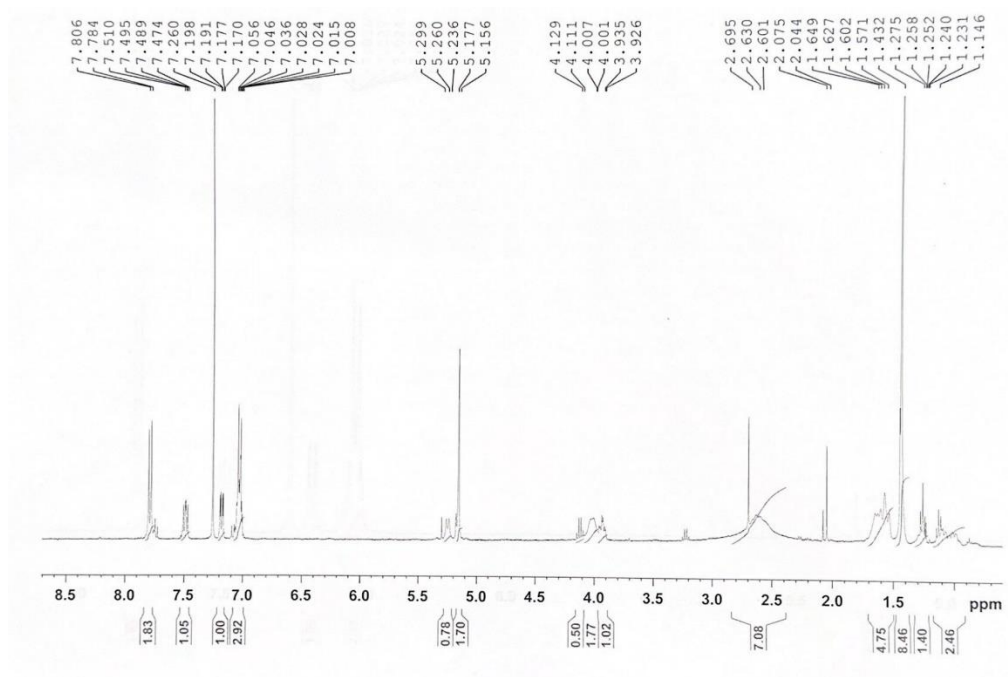

Compound 12:  $^1\text{H}$  NMR (400 MHz,  $\text{CDCl}_3$ ).

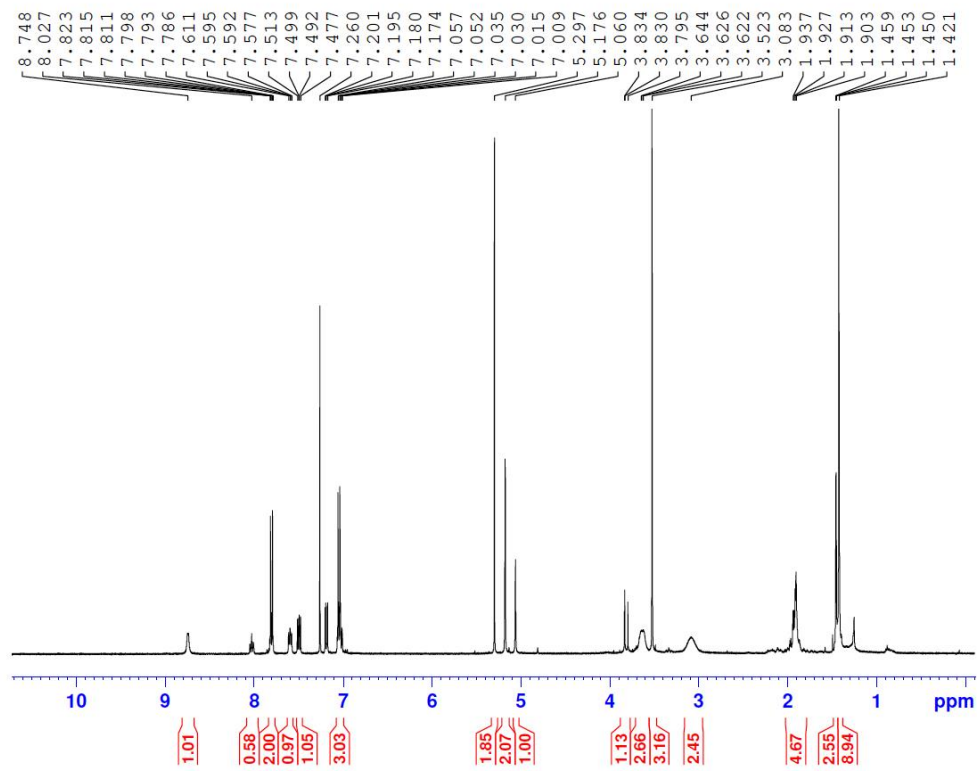



Compound 13:  $^1\text{H}$  NMR (400 MHz,  $\text{CDCl}_3$ ).

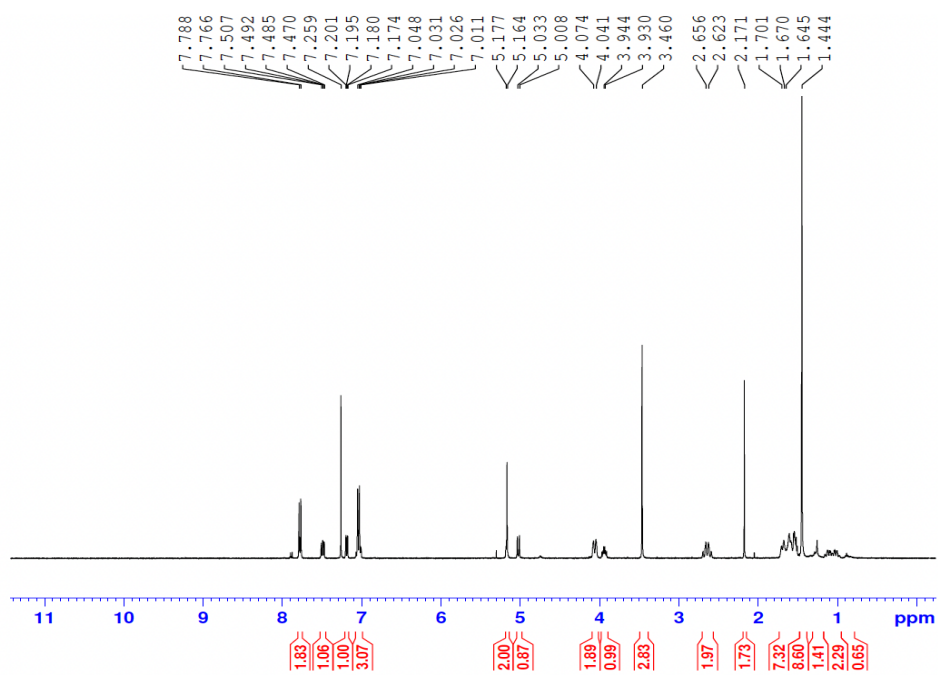

Compound 14:  $^1\text{H}$  NMR (400 MHz, DMSO).

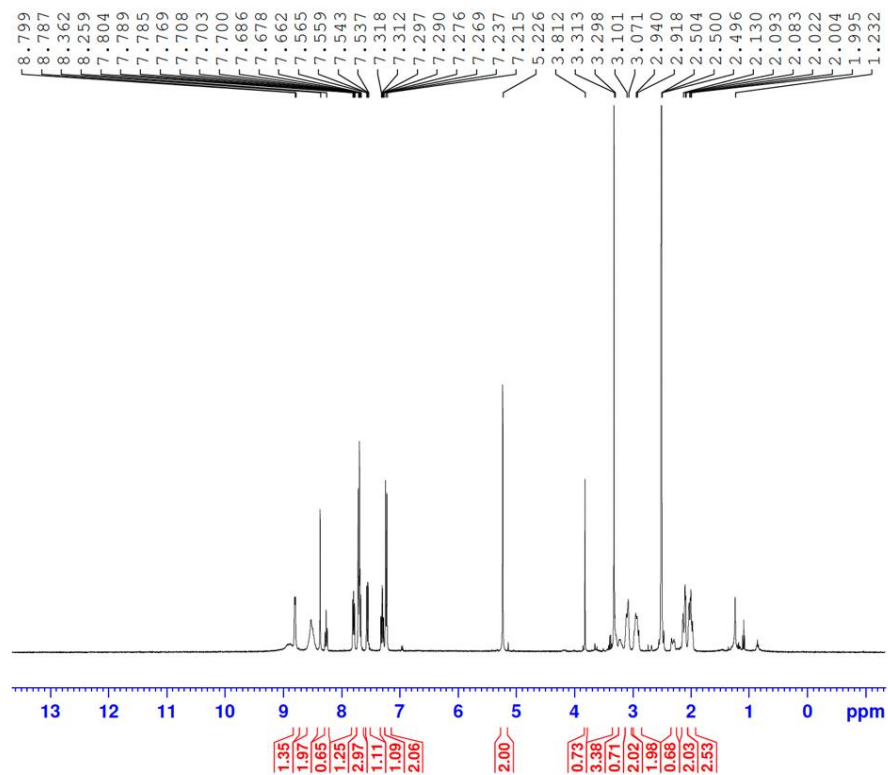

Compound 15:  $^1\text{H}$  NMR (400 MHz, MeOD).

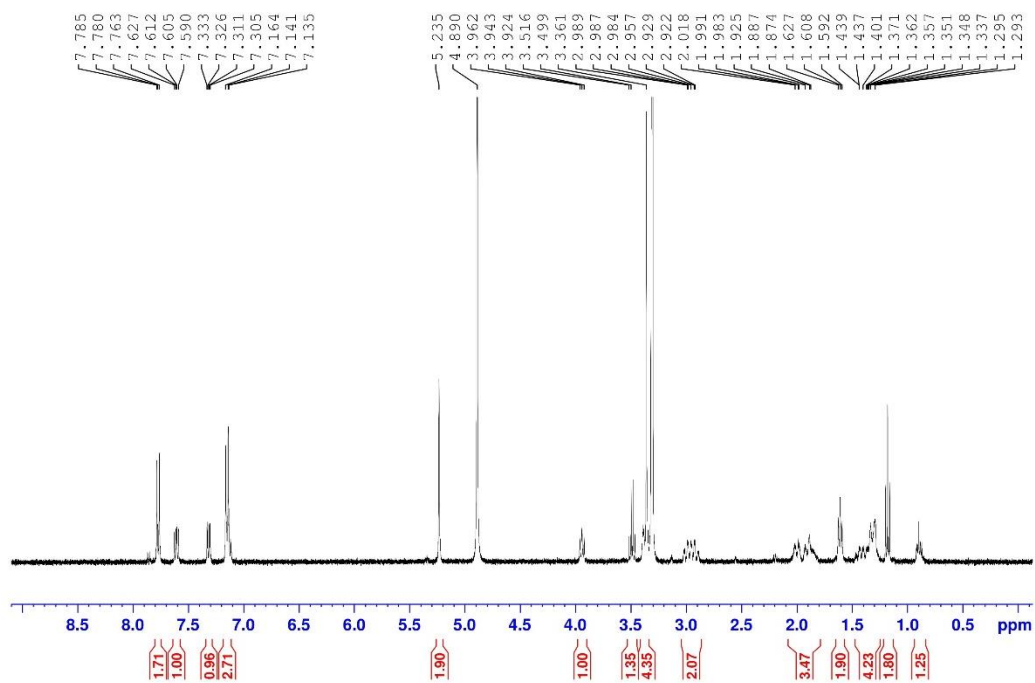

Compound 16:  $^1\text{H}$  NMR (400 MHz,  $\text{CDCl}_3$ ).

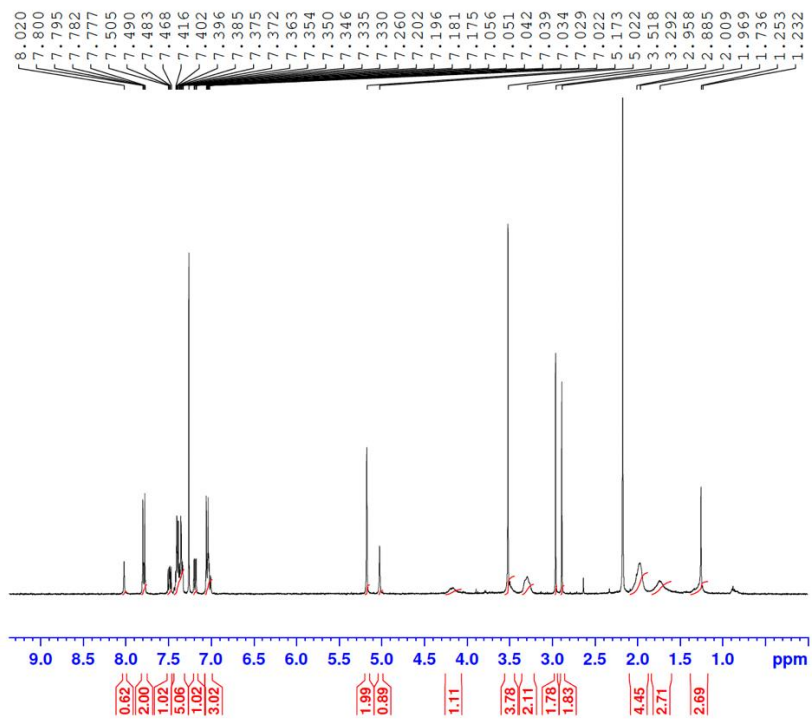

Compound 16:  $^1\text{H}$ - $^1\text{H}$  COSY NMR (400 MHz,  $\text{CDCl}_3$ ).

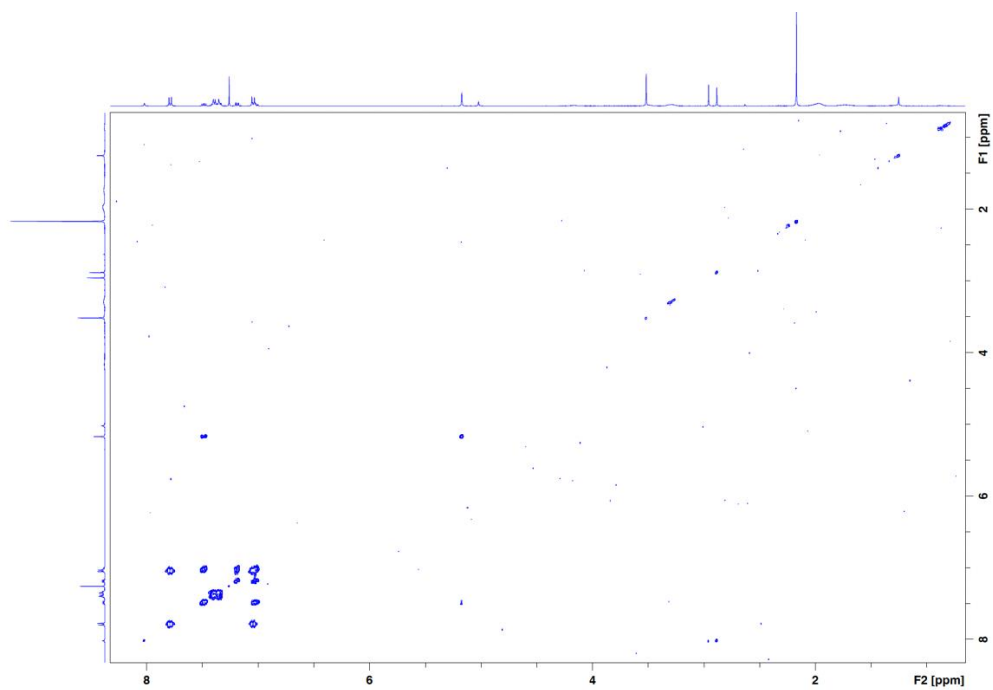

Compound 17:  $^1\text{H}$  NMR (400 MHz,  $\text{CDCl}_3$ ).

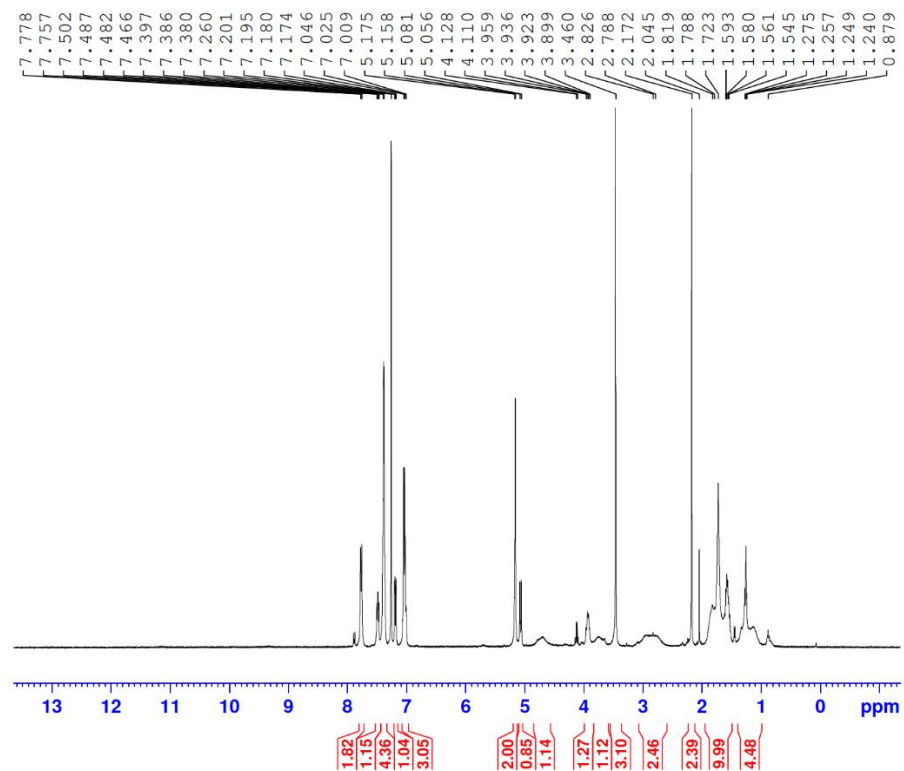

Compound 18:  $^1\text{H}$  NMR (400 MHz, DMSO).

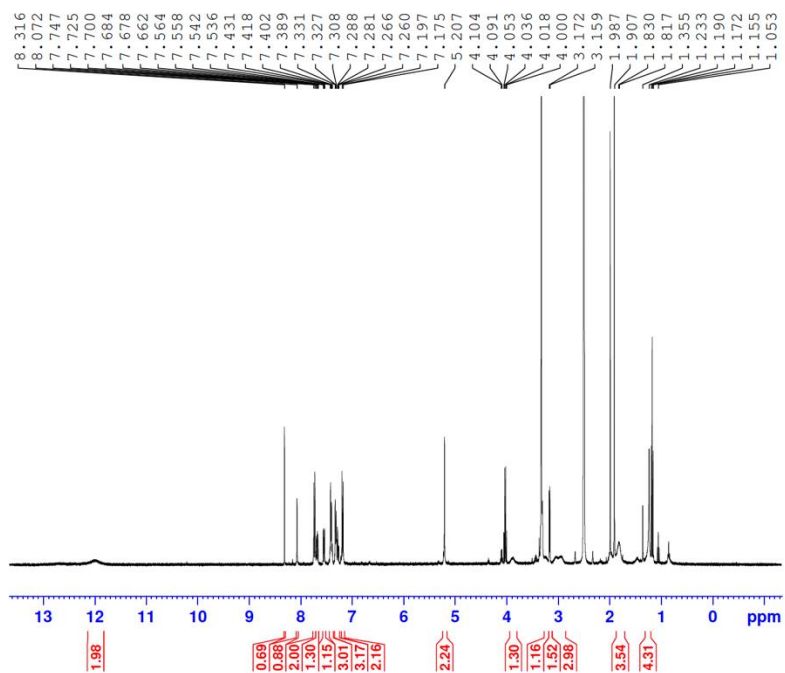

Compound 19:  $^1\text{H}$  NMR (400 MHz, MeOD).

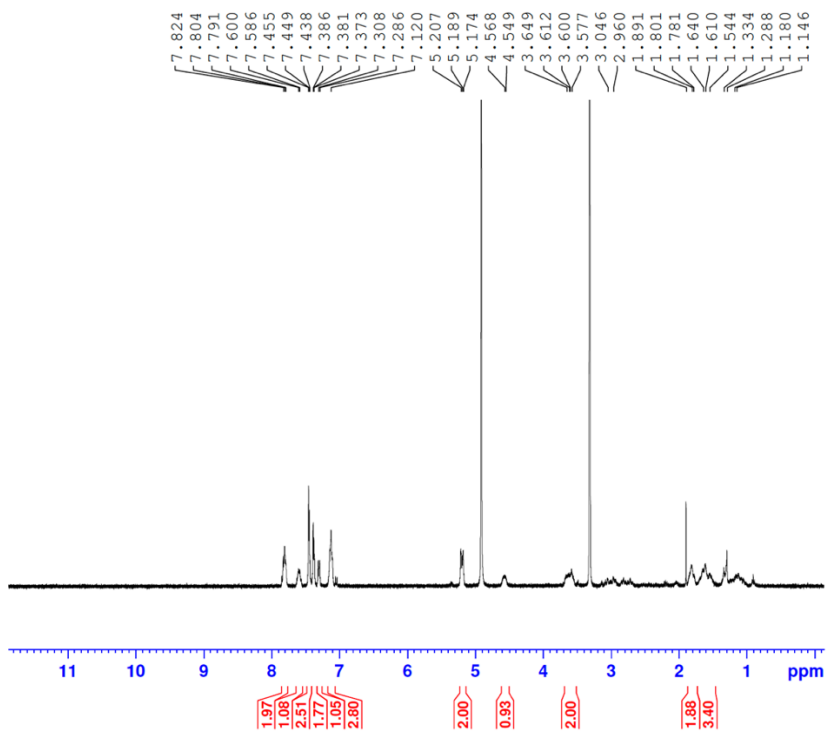

### Scheme 3: Synthesis of final compound 3

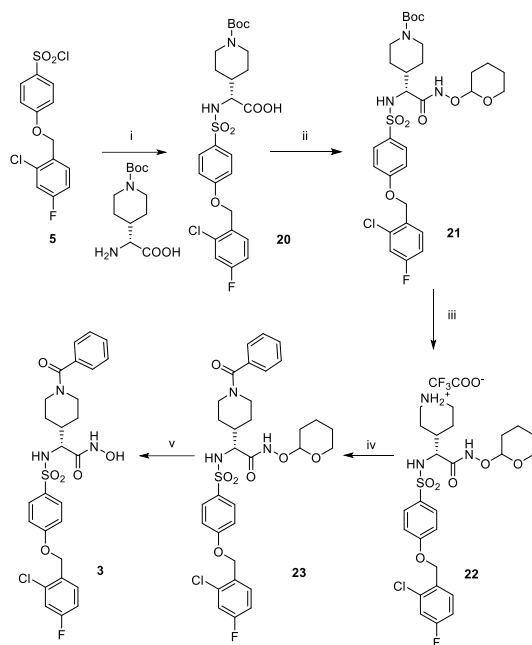

Compound 20: <sup>1</sup>H NMR (400 MHz, DMSO).

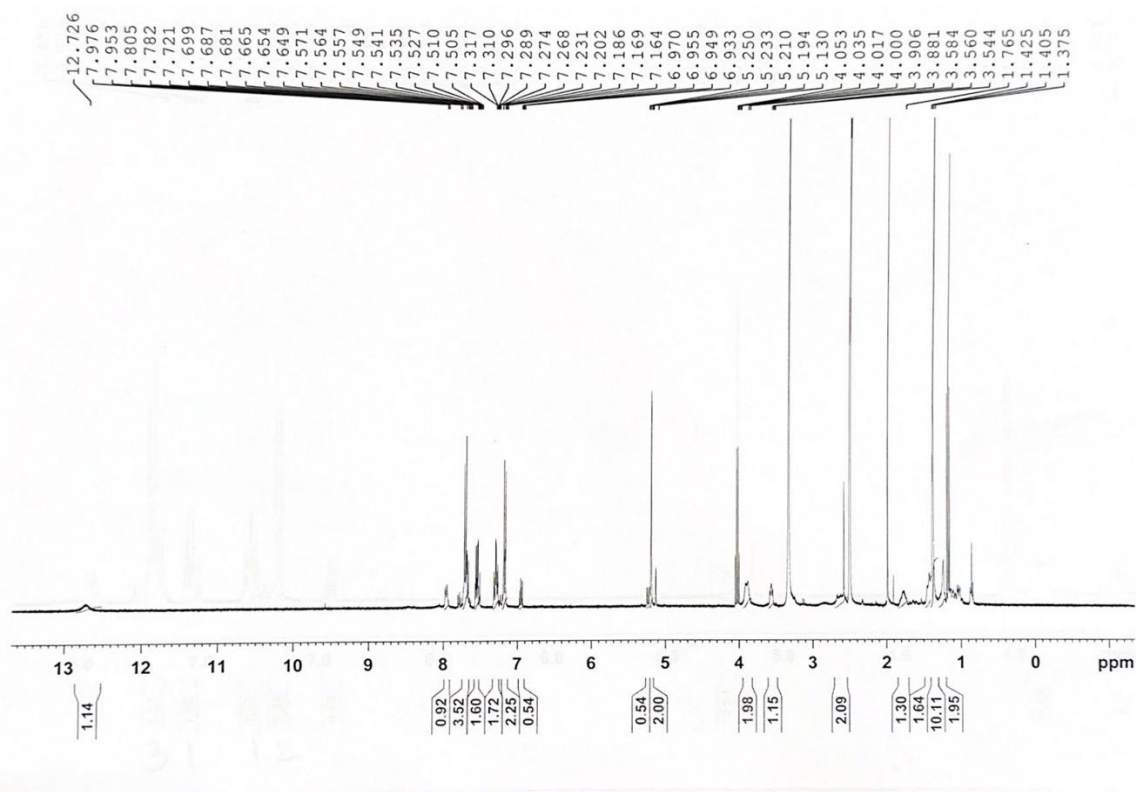

Compound 21:  $^1\text{H}$  NMR (400 MHz,  $\text{CDCl}_3$ ).

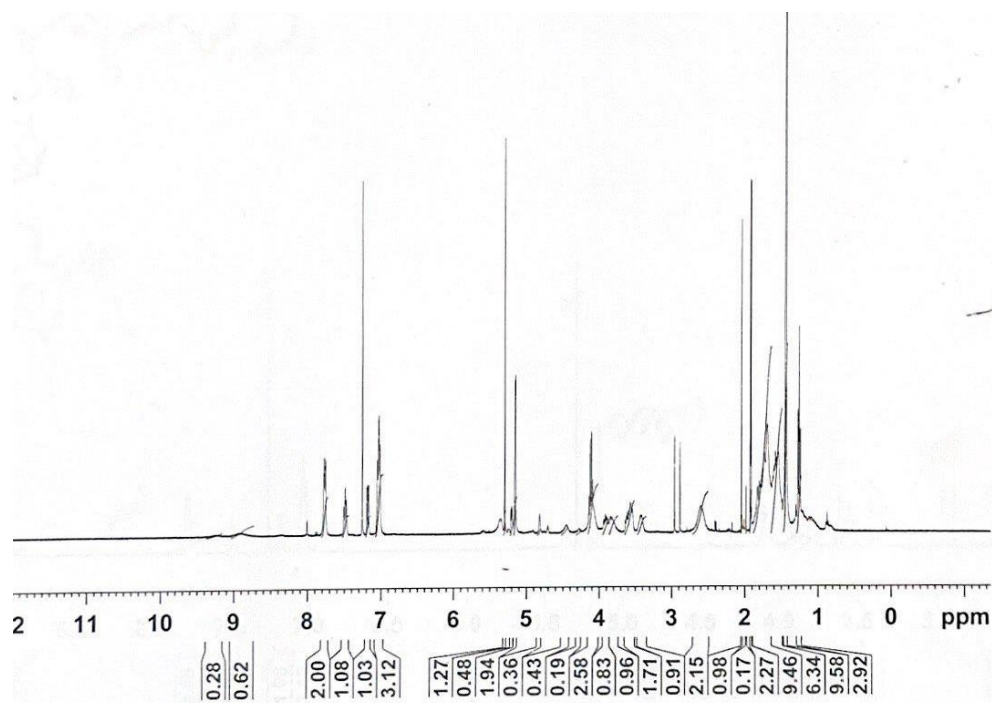

Compound 22:  $^1\text{H}$  NMR (400 MHz, MeOD).

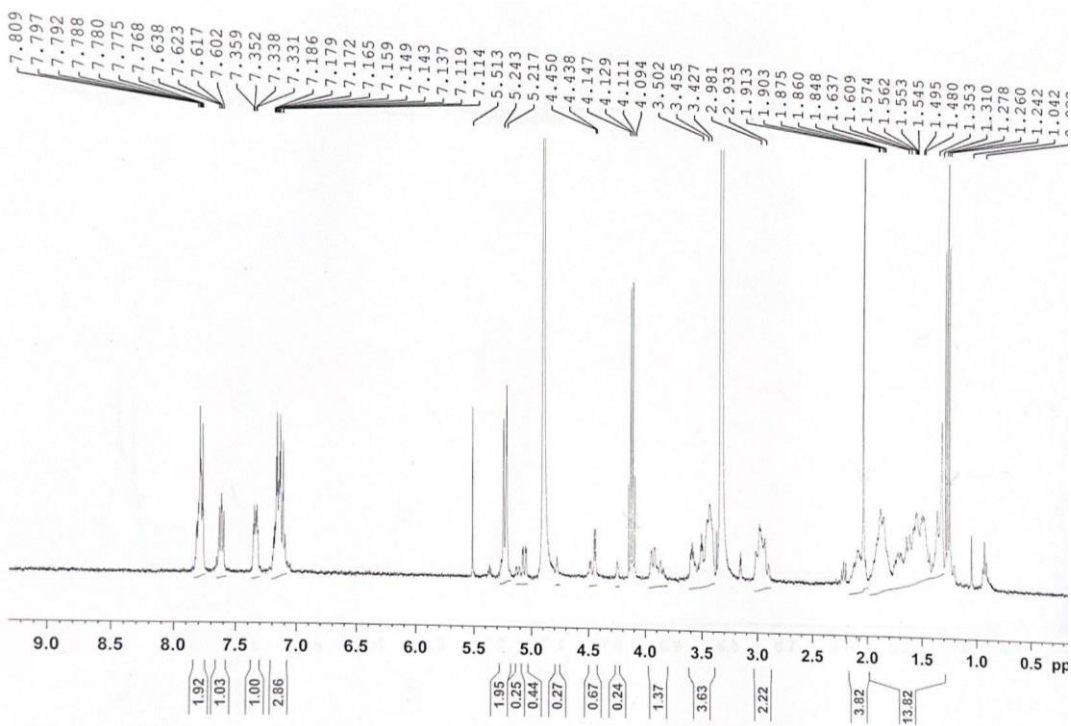

### Scheme 4: Synthesis of final compounds 3a-g

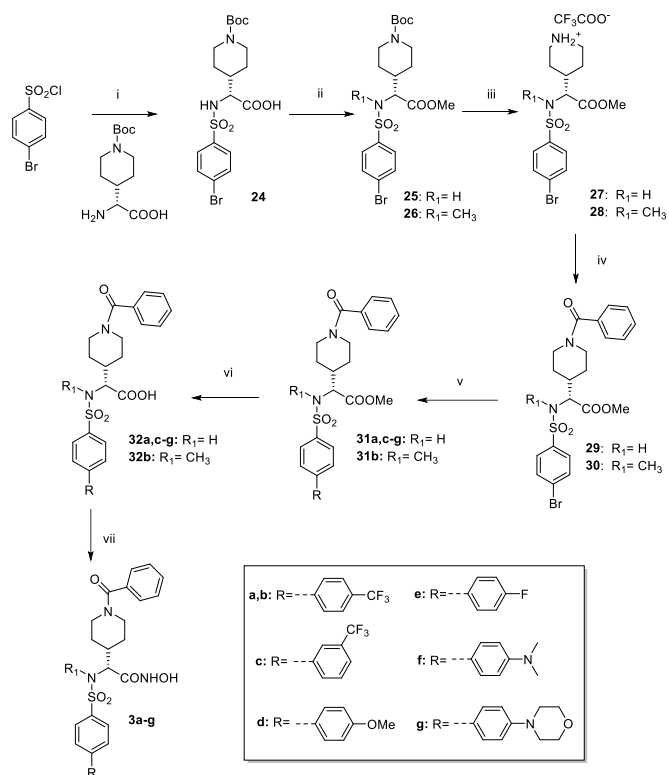

Compound **24**: <sup>1</sup>H NMR (400 MHz, CDCl<sub>3</sub>).

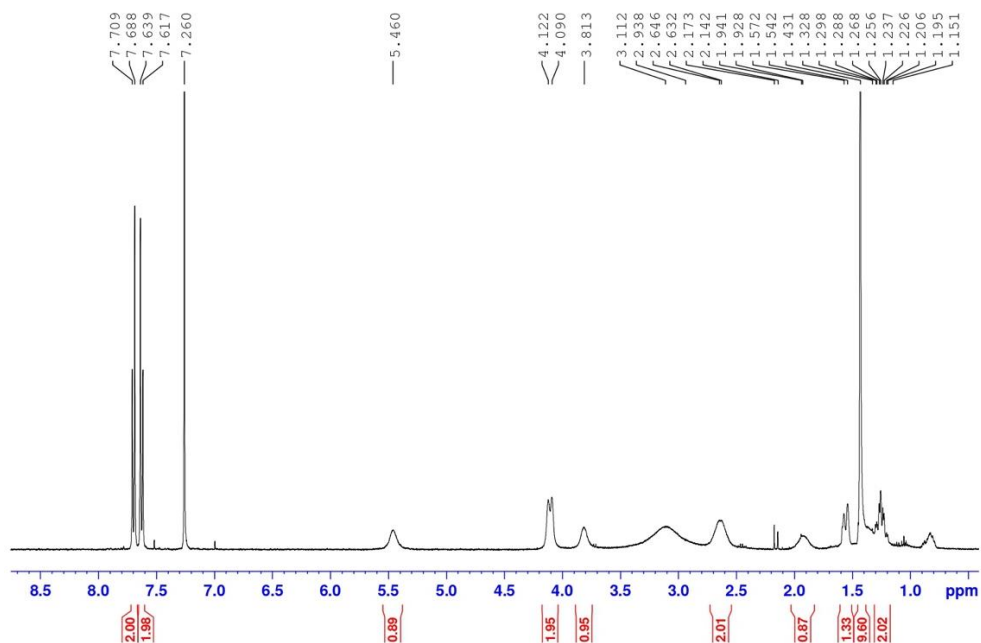

Compound 25:  $^1\text{H}$  NMR (400 MHz,  $\text{CDCl}_3$ ).

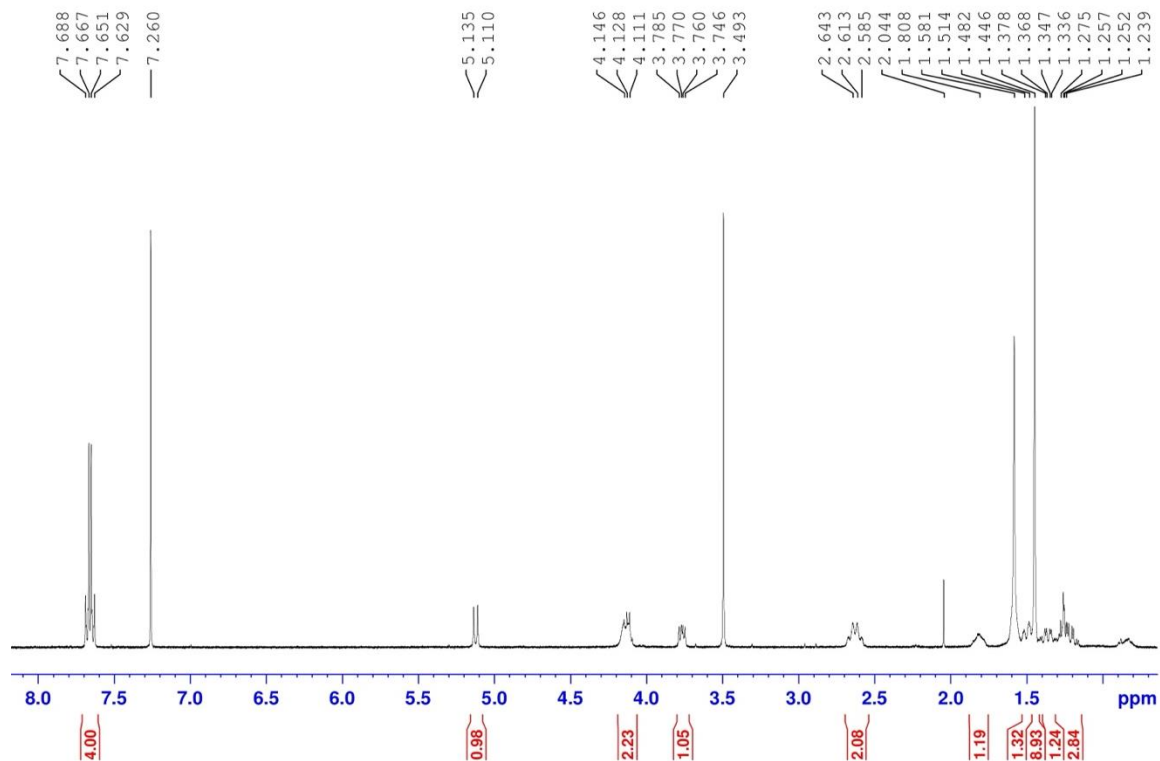

Compound 26:  $^1\text{H}$  NMR (400 MHz,  $\text{CDCl}_3$ ).

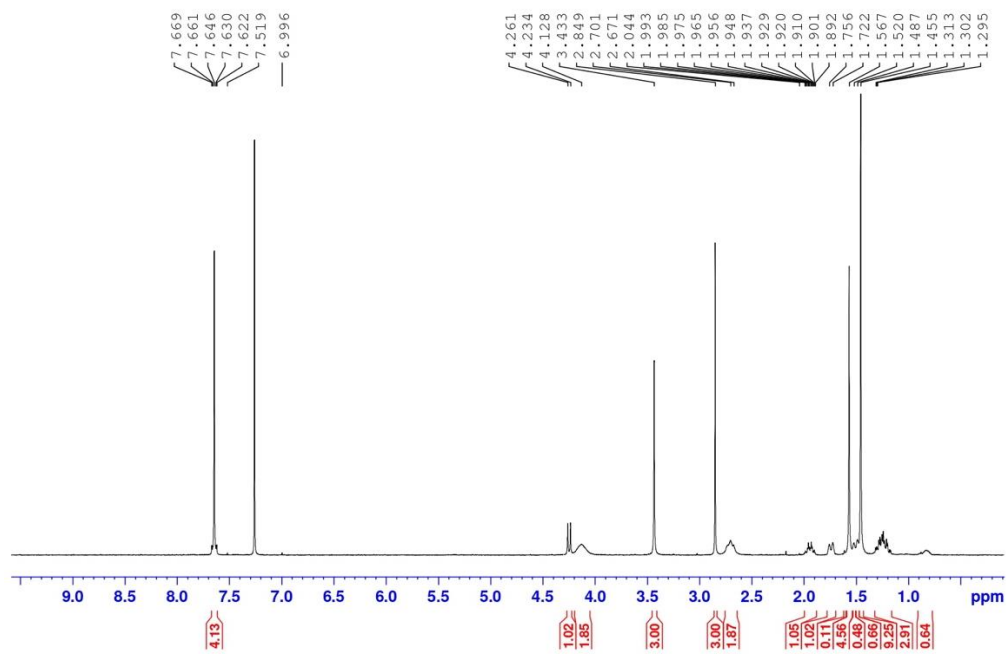



Compound 27:  $^1\text{H}$  NMR (400 MHz,  $\text{CDCl}_3$ ).

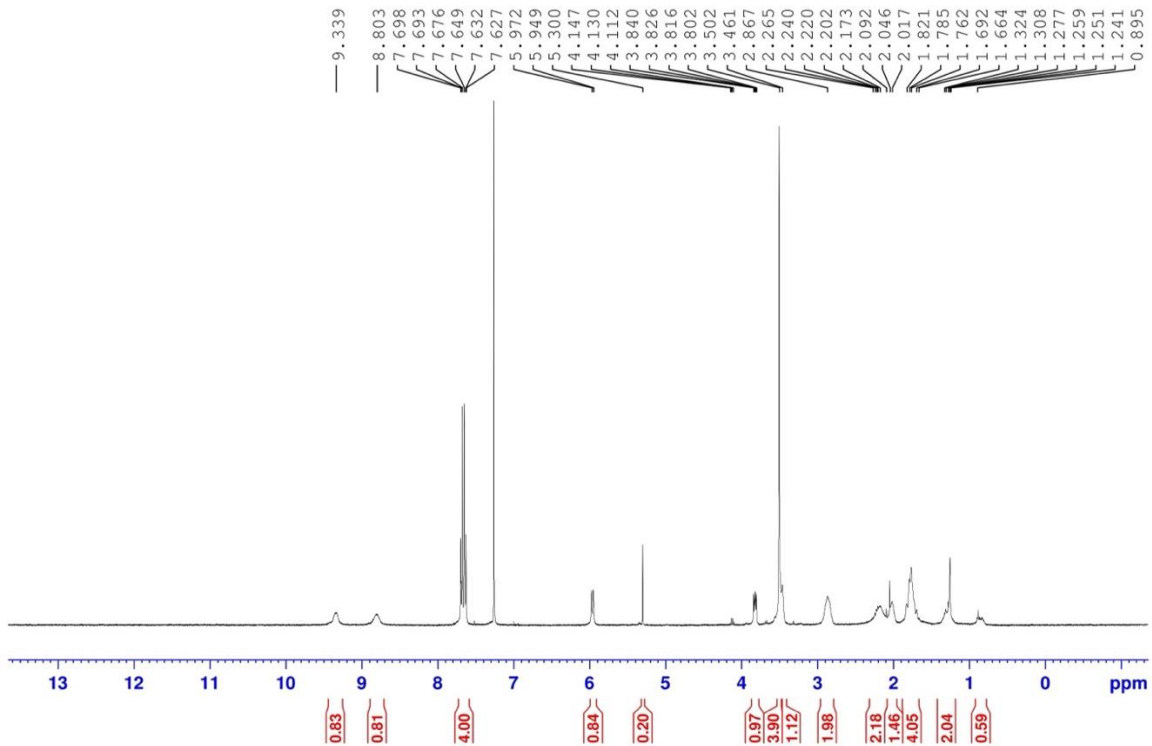

Compound 27:  $^{13}\text{C}$  NMR (400 MHz,  $\text{CDCl}_3$ ).

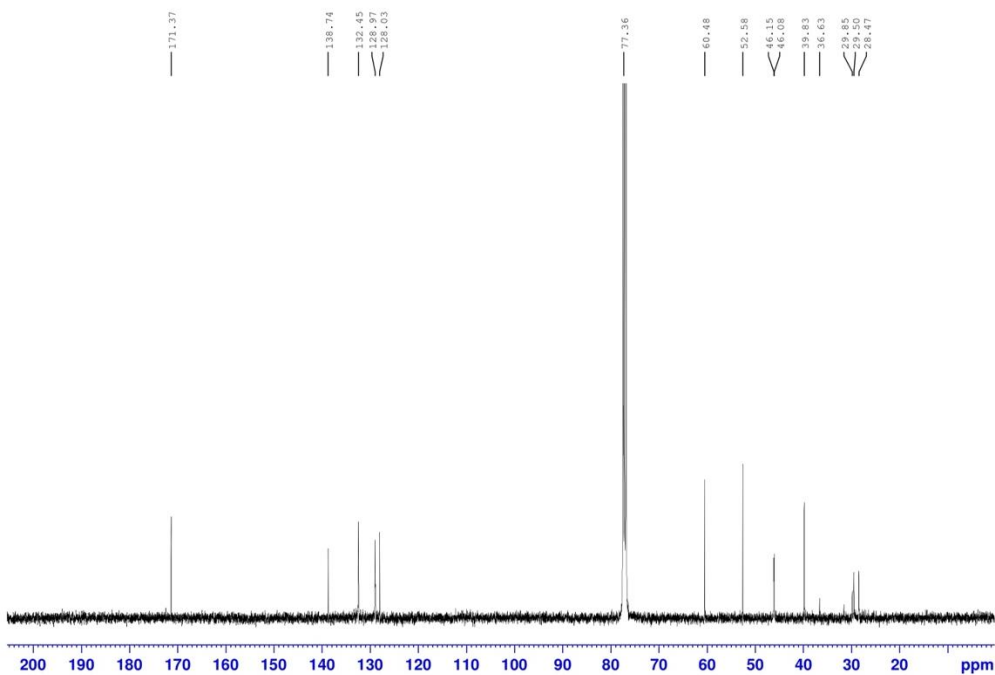

Compound **28**:  $^1\text{H}$  NMR (400 MHz,  $\text{CDCl}_3$ ).

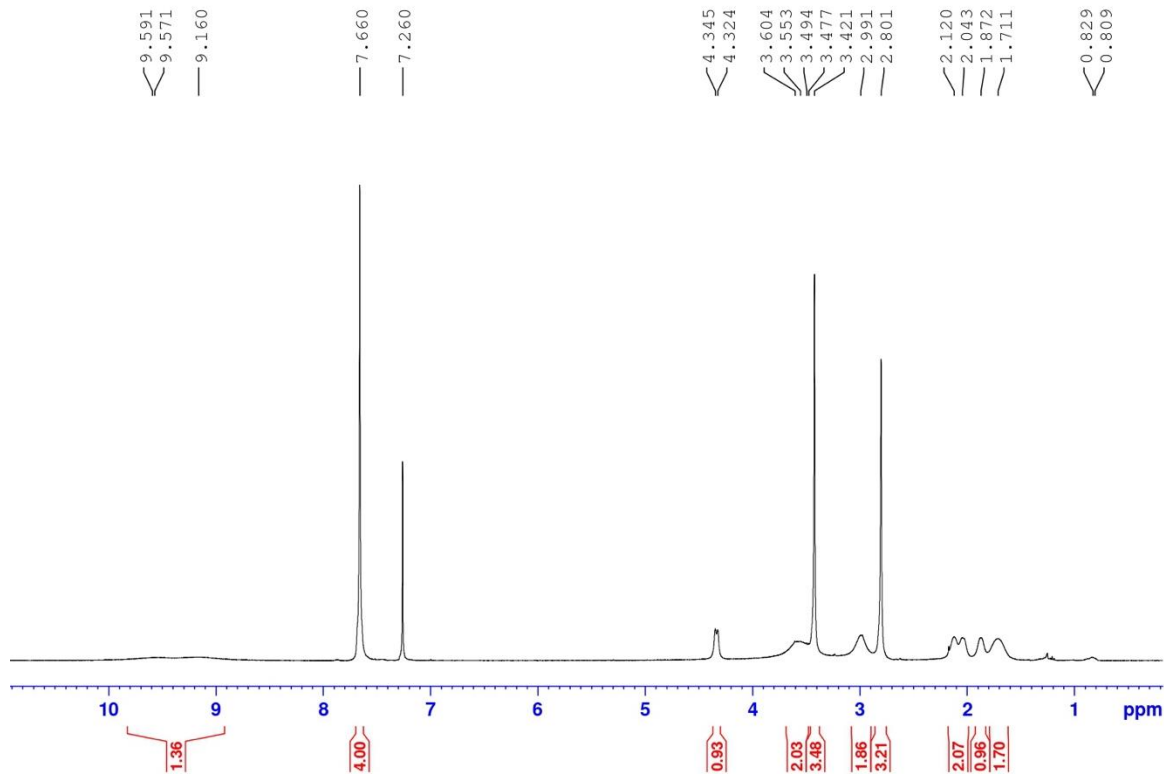

Compound **29**:  $^1\text{H}$  NMR (400 MHz,  $\text{CDCl}_3$ ).

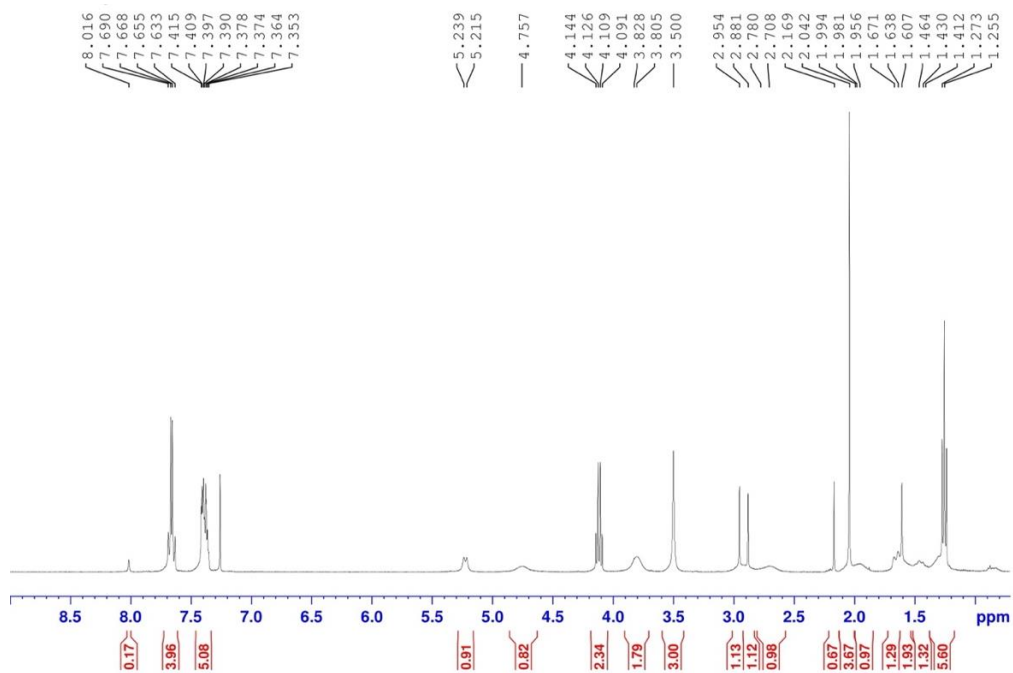

Compound **30**:  $^1\text{H}$  NMR (400 MHz,  $\text{CDCl}_3$ ).

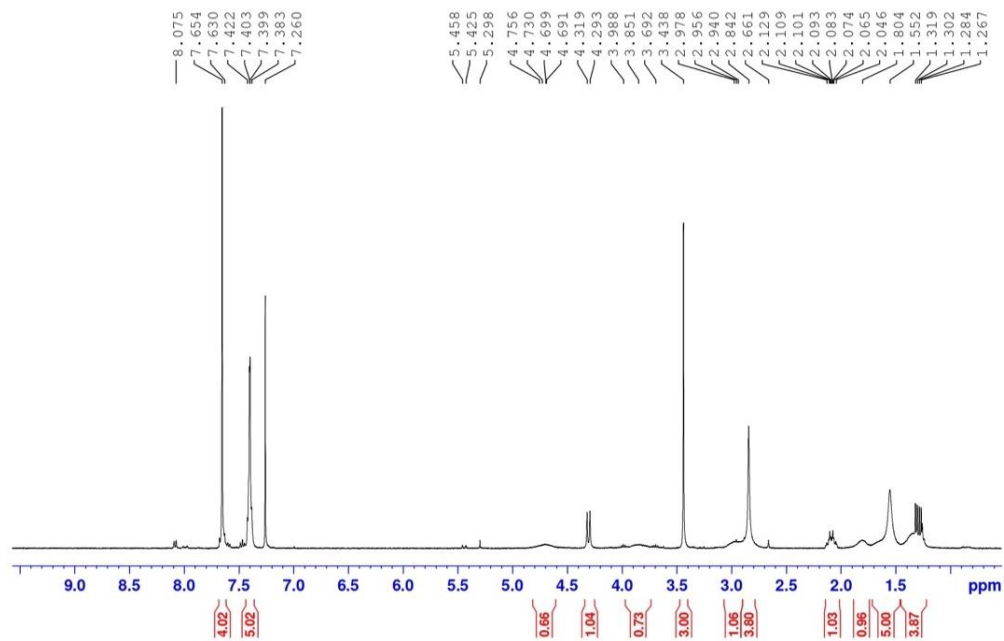

Compound **31a**:  $^1\text{H}$  NMR (400 MHz,  $\text{CDCl}_3$ ).

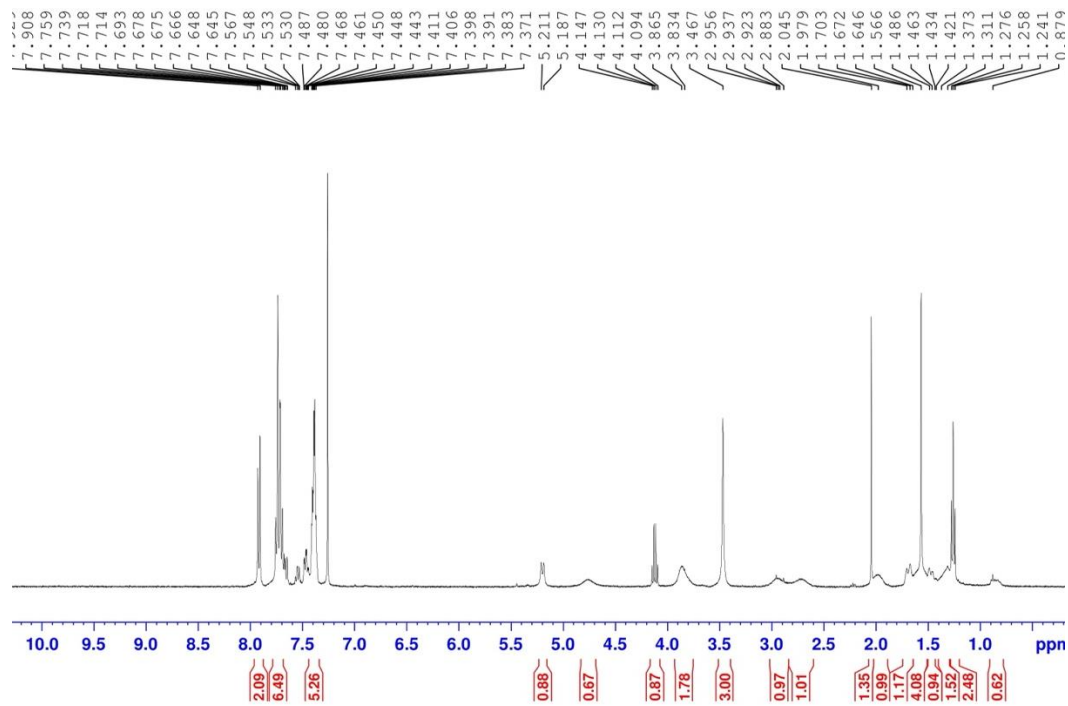

Compound **31b**:  $^1\text{H}$  NMR (400 MHz,  $\text{CDCl}_3$ ).

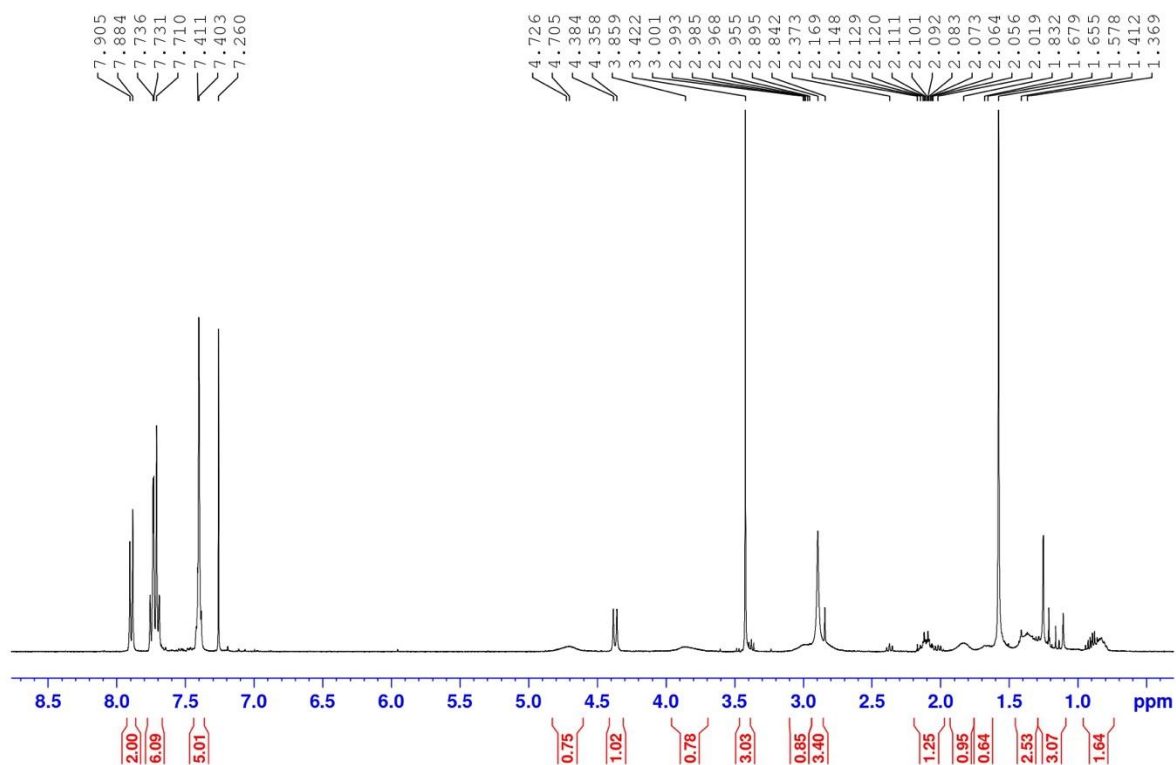

Compound **31c**:  $^1\text{H}$  NMR (400 MHz,  $\text{CDCl}_3$ ).

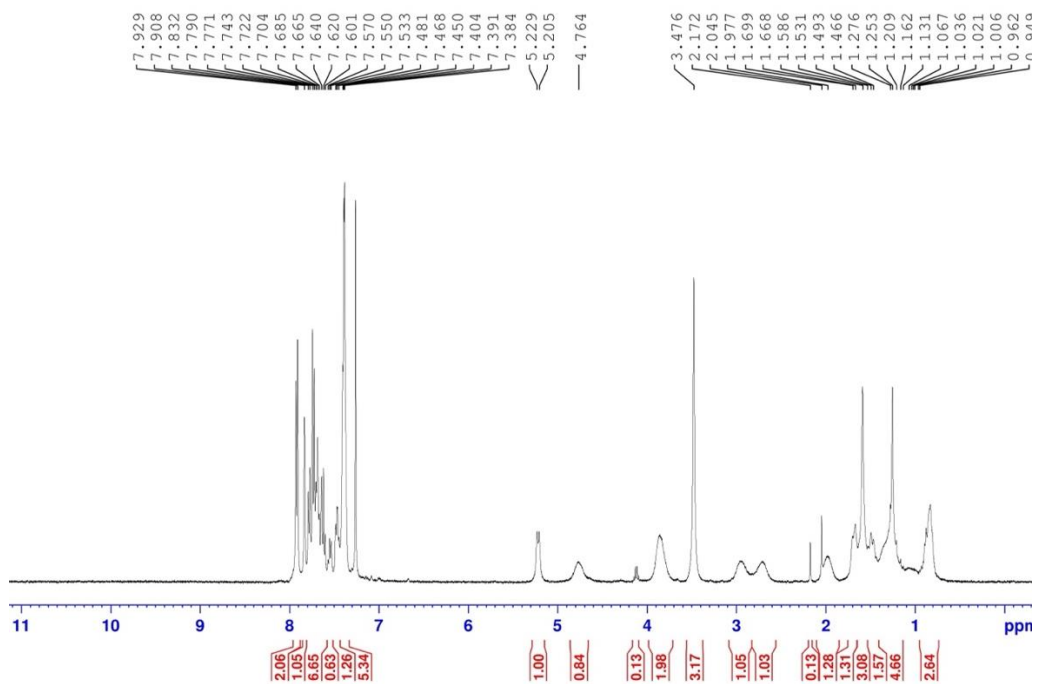

Compound **31d**:  $^1\text{H}$  NMR (400 MHz,  $\text{CDCl}_3$ ).

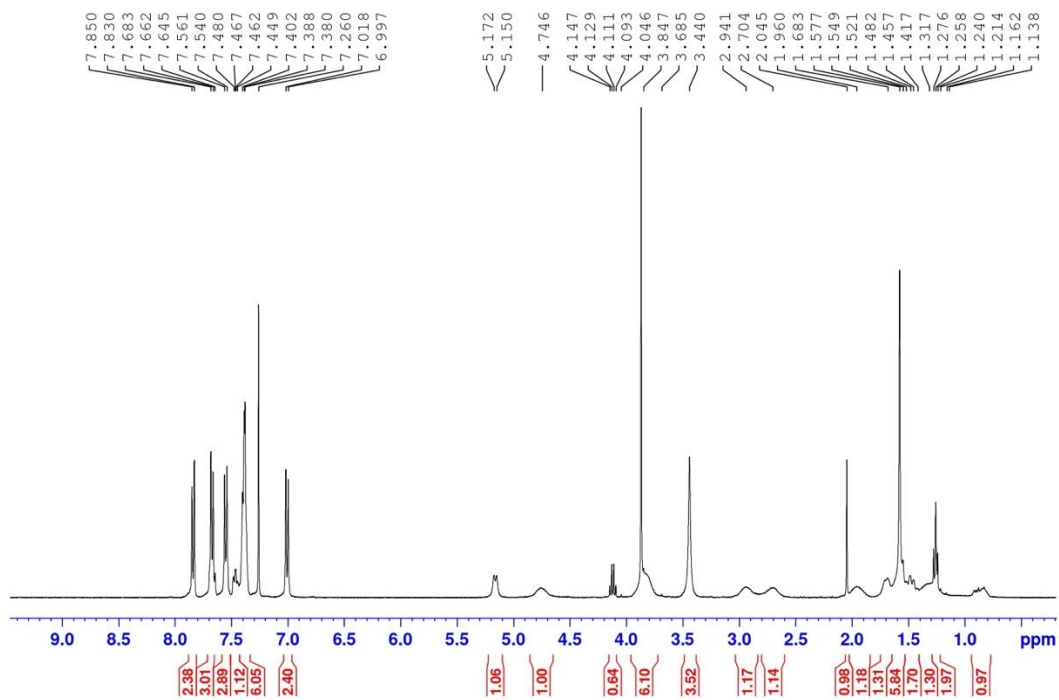

Compound **31e**:  $^1\text{H}$  NMR (400 MHz,  $\text{CDCl}_3$ ).

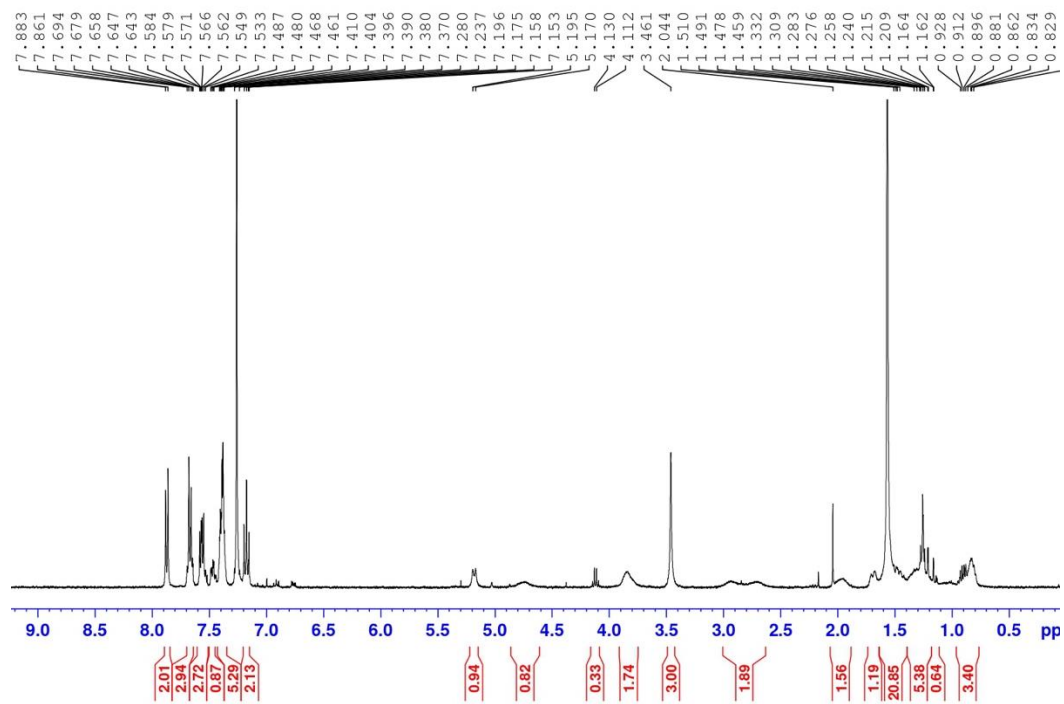

Compound **31f**:  $^1\text{H}$  NMR (400 MHz,  $\text{CDCl}_3$ ).

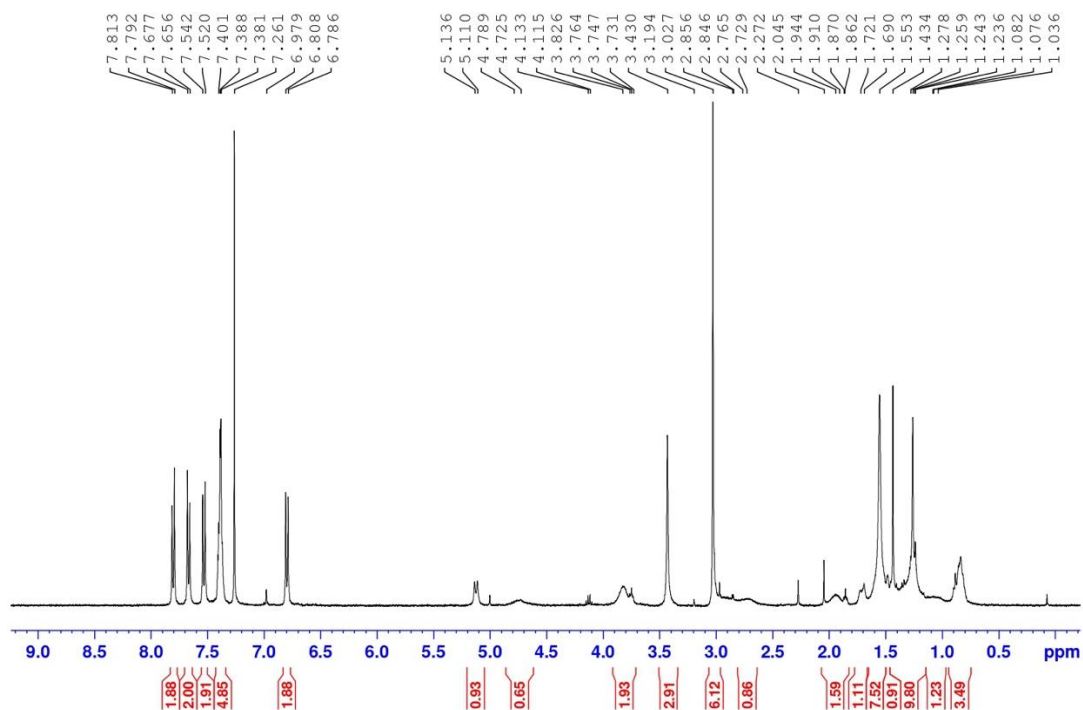

Compound **31g**:  $^1\text{H}$  NMR (400 MHz,  $\text{CDCl}_3$ ).

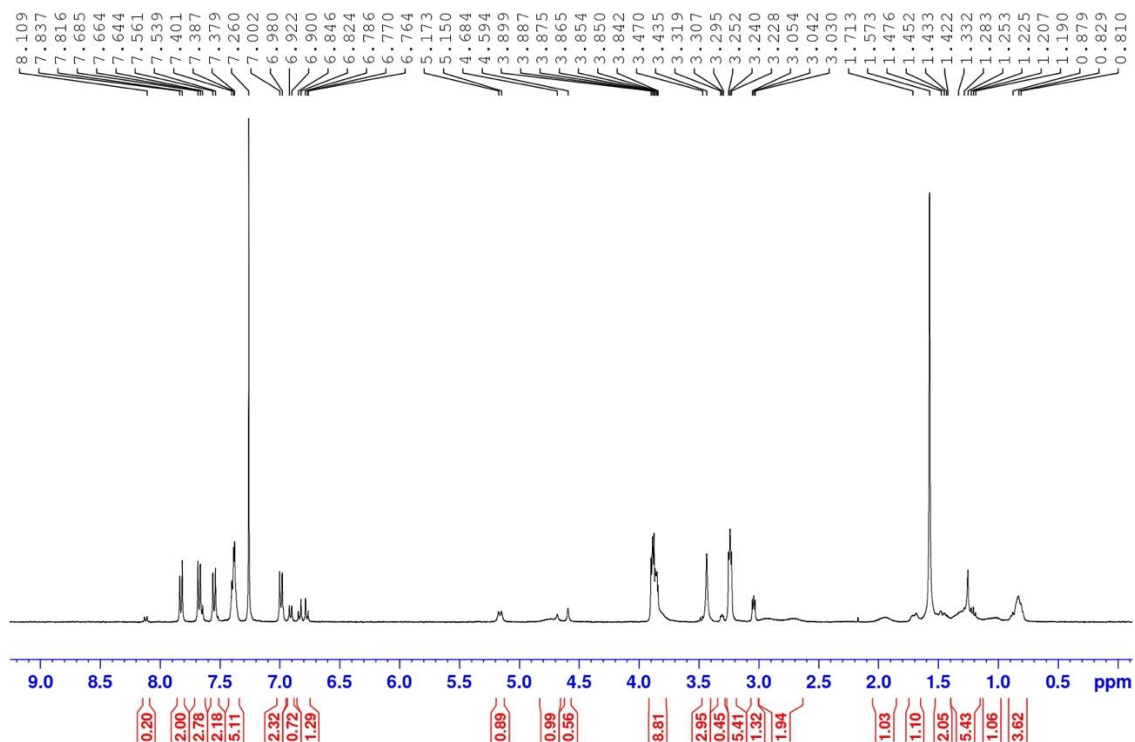

Compound **32a**:  $^1\text{H}$  NMR (400 MHz,  $\text{CDCl}_3$ ).

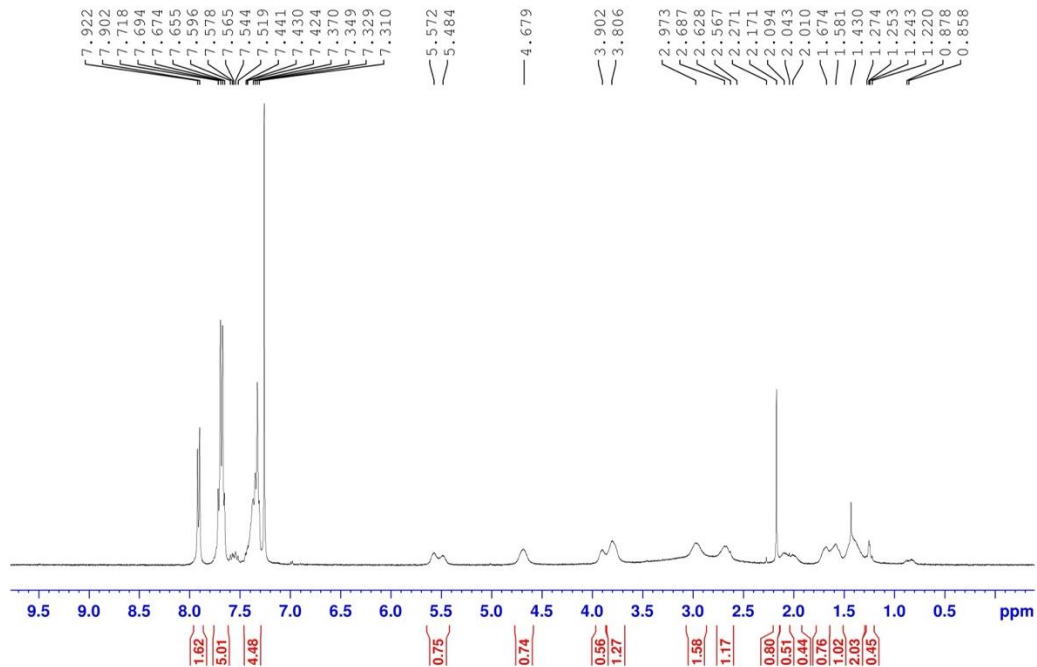

Compound **32b**:  $^1\text{H}$  NMR (400 MHz,  $\text{CDCl}_3$ ).

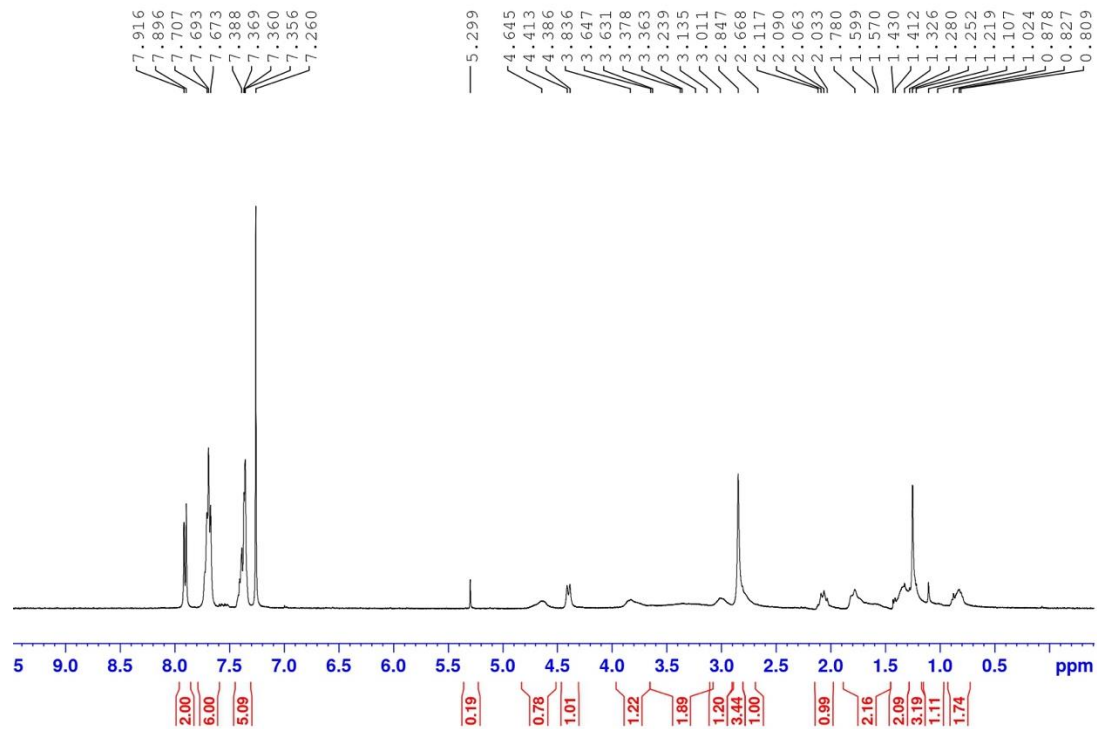

Compound **32c**:  $^1\text{H}$  NMR (400 MHz,  $\text{CDCl}_3$ ).

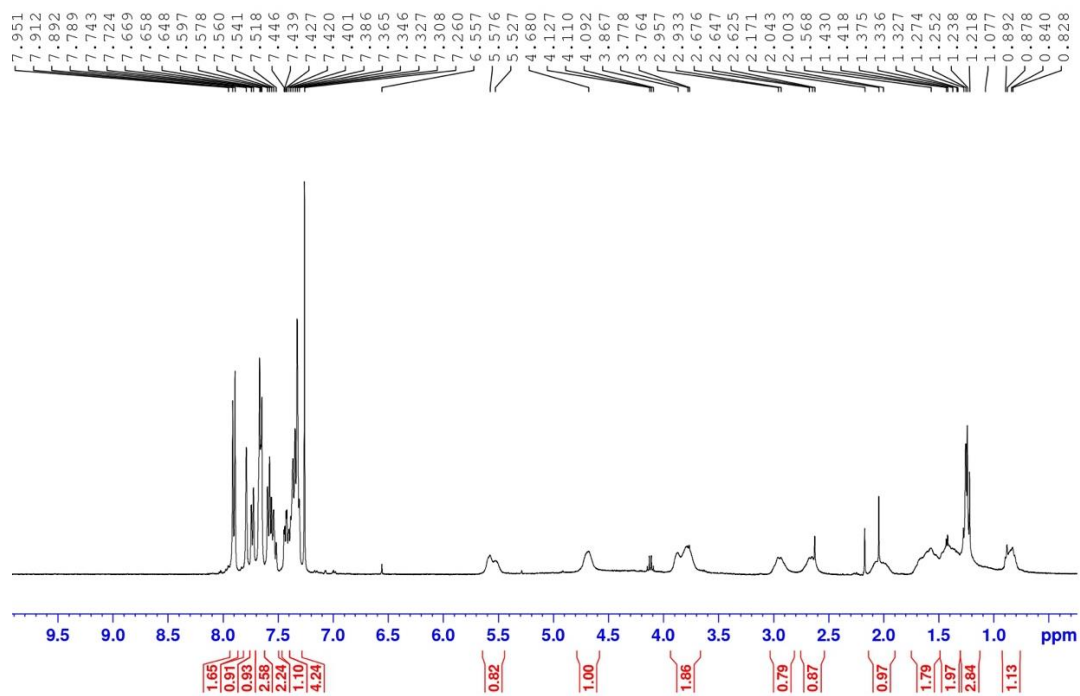

Compound **32c**:  $^{13}\text{C}$  NMR (400 MHz,  $\text{CDCl}_3$ ).

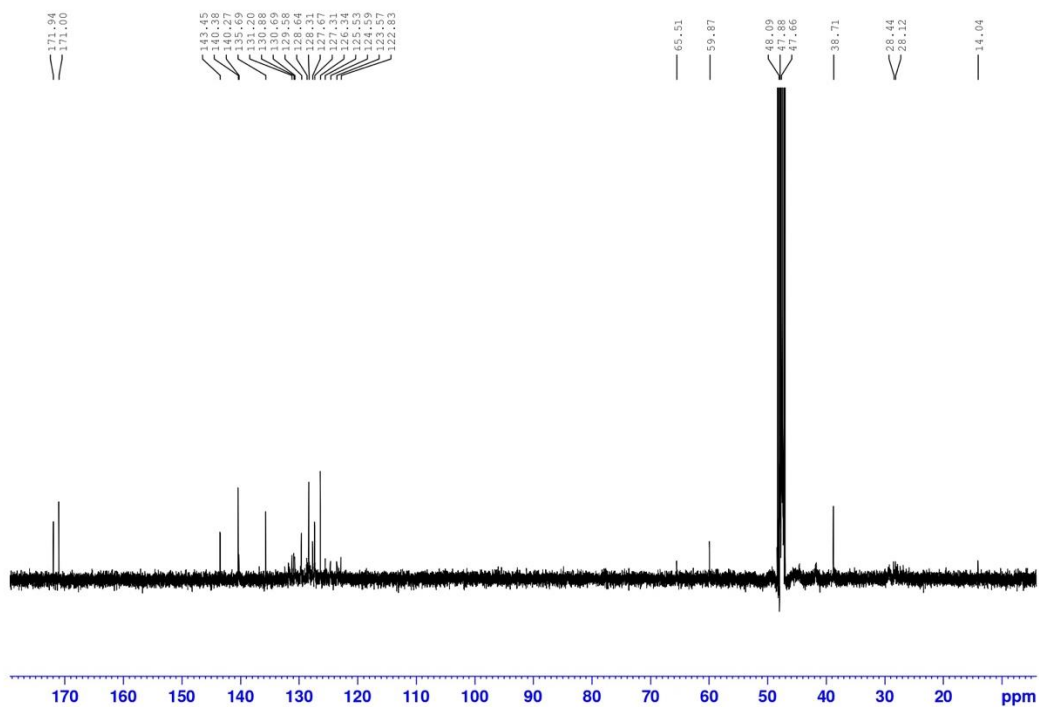



Compound **32d**:  $^1\text{H}$  NMR (400 MHz,  $\text{CDCl}_3$ ).

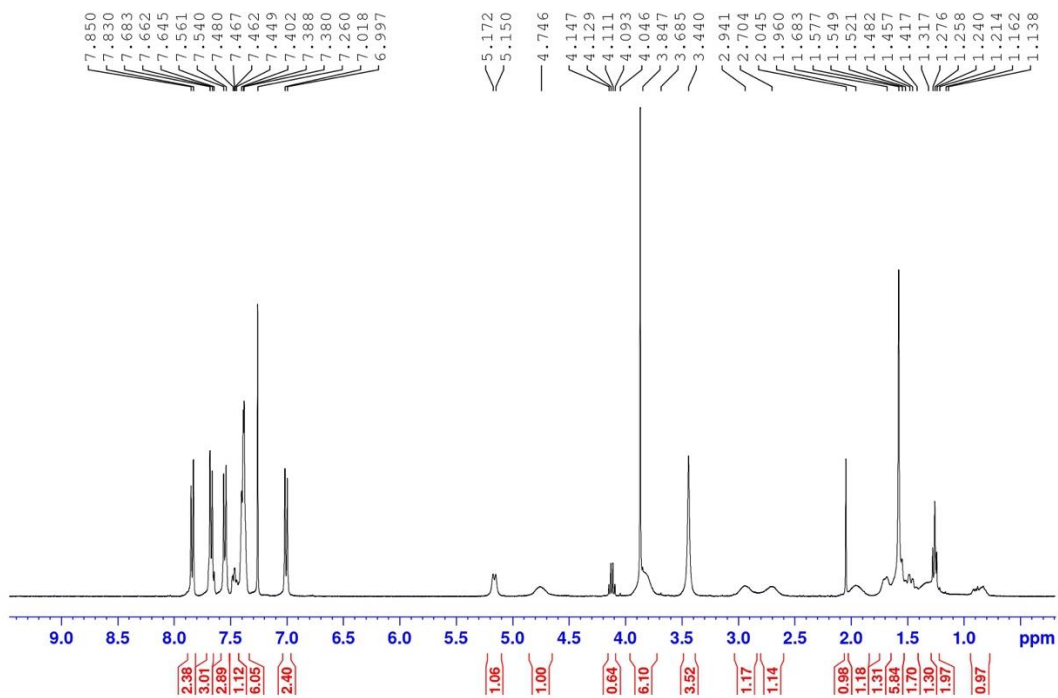

Compound **32e**:  $^1\text{H}$  NMR (400 MHz,  $\text{CDCl}_3$ ).

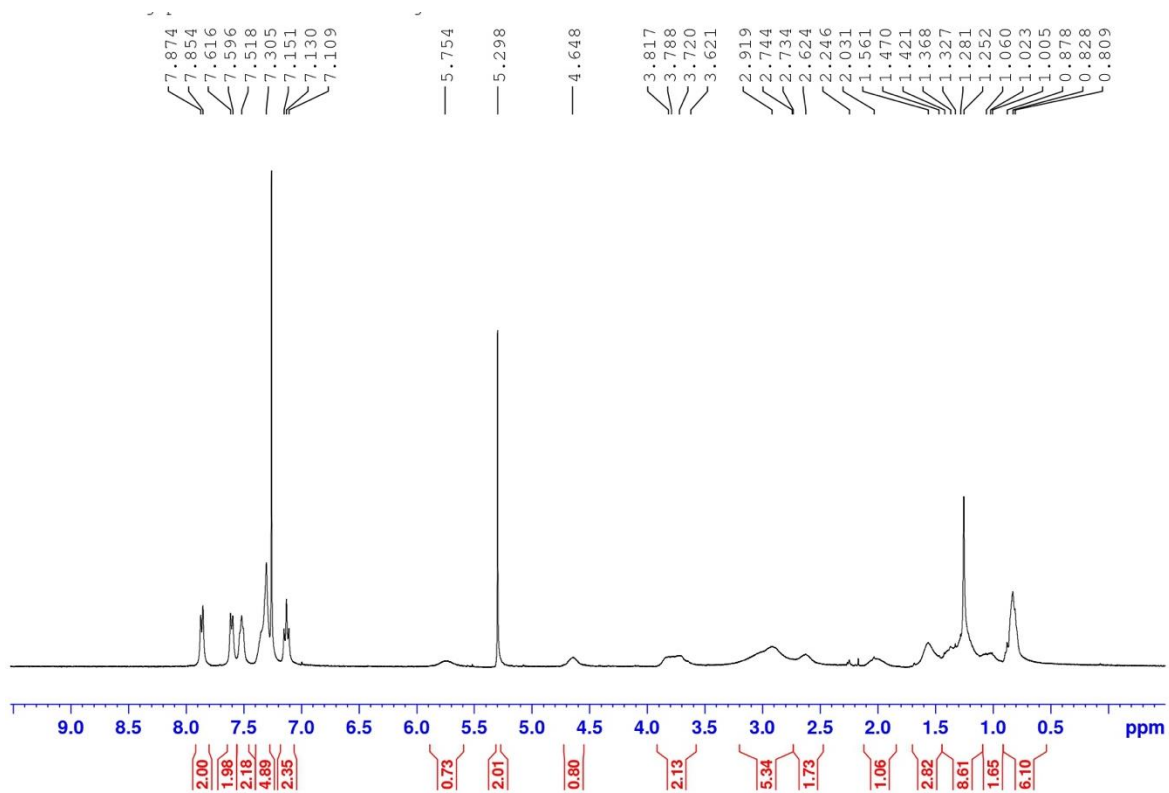

Compound **32f**:  $^1\text{H}$  NMR (400 MHz, DMSO).

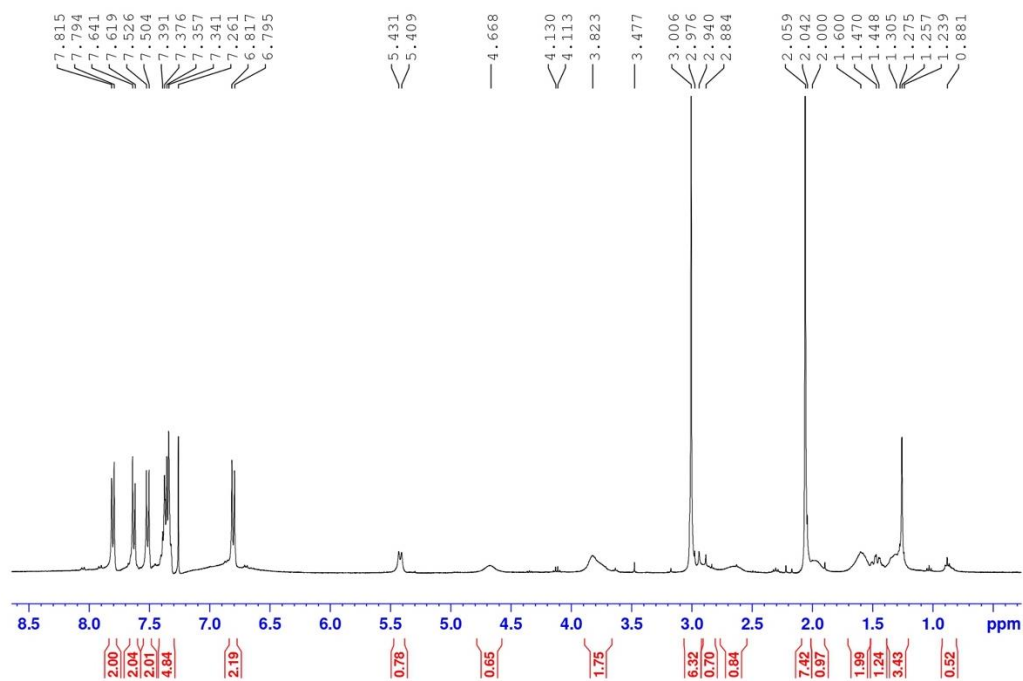

Compound **32g**:  $^1\text{H}$  NMR (400 MHz, DMSO).

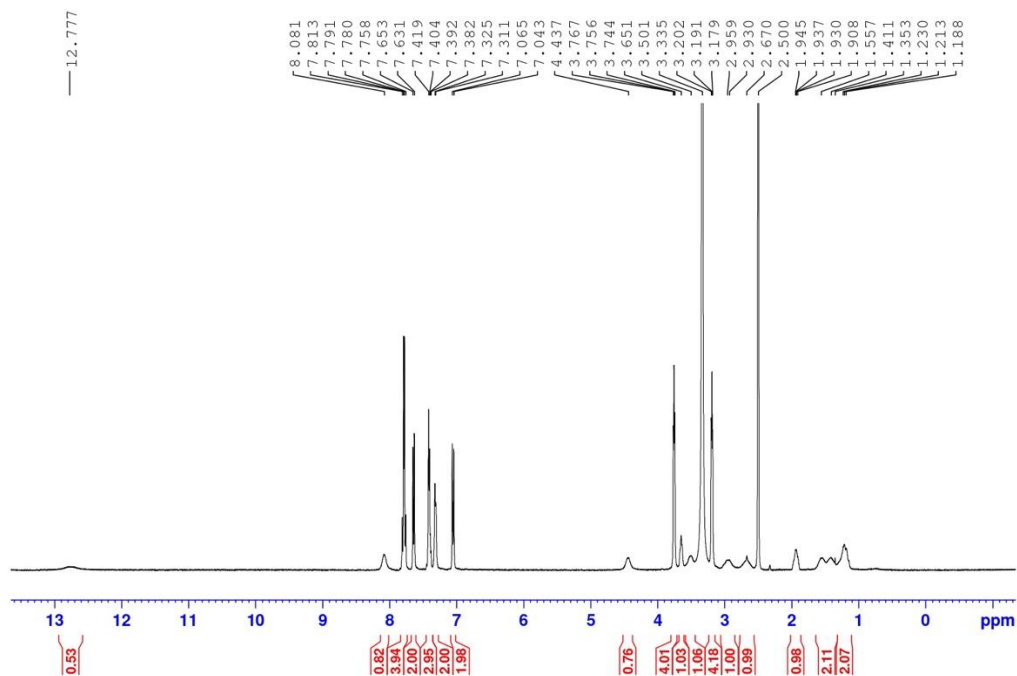

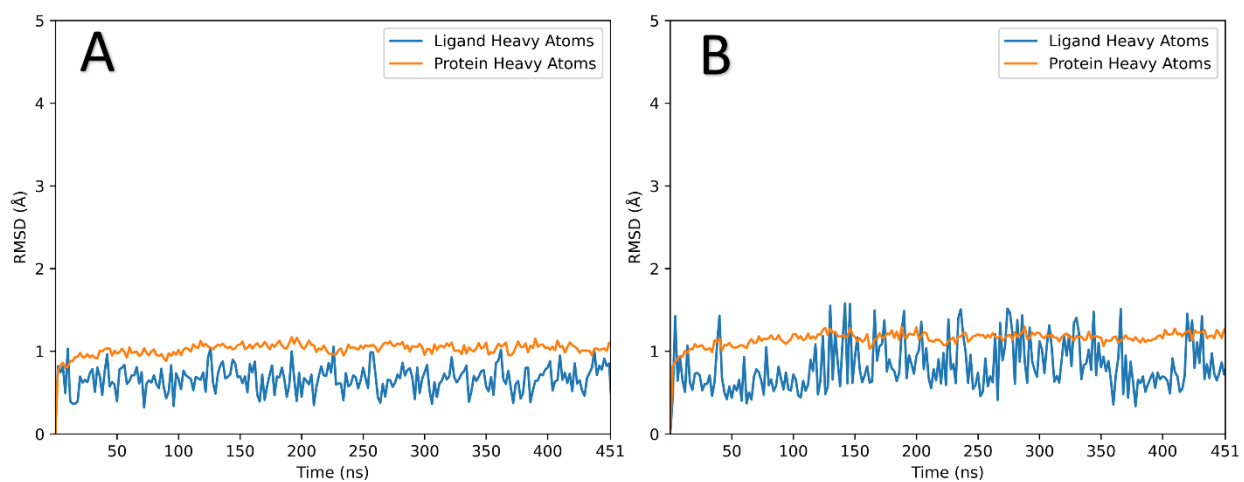

**Figure S1.** The plot shows the RMSD of **3a** and protein heavy atoms for the ADAMTS5-**3a** (A) and ADAMTS7-**3a** (B) complexes during the MD simulations.

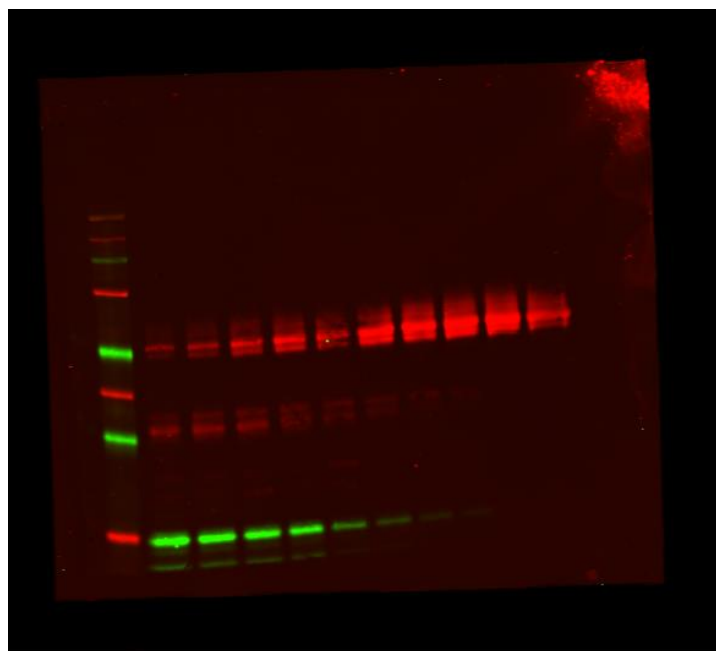

**Figure S2.** Original Western Blot for the image shown in Figure 2 in the main text. In the latter, the last lane of the original image as shown here was cropped out as it related to a different experiment.
